## RESEARCH ARTICLE

# Knowledge, attitudes and practices towards rabies: A survey of the general population residing in the Harare Metropolitan Province of Zimbabwe

Reverend M. Spargo<sup>1</sup>, Andre Coetzer<sup>2,3\*</sup>, Francis T. Makuvadze<sup>4</sup>, Sylvester M. Chikerema<sup>5</sup>, Vaida Chiwerere<sup>5</sup>, Esnath Bhara<sup>5</sup>, Louis H. Nel<sup>2,3</sup>

**1** Division of Epidemiology and Disease Control, Department of Veterinary Services, Harare, Zimbabwe, **2** Department of Biochemistry, Genetics and Microbiology, University of Pretoria, Pretoria, South Africa, **3** Global Alliance for Rabies Control SA NPC, Pretoria, South Africa, **4** Department of Paraclinical Veterinary Studies, University of Zimbabwe, Harare, Zimbabwe, **5** Department of Clinical Veterinary Studies, University of Zimbabwe, Harare, Zimbabwe

\* [andre.coetzer@rabiesalliance.org](mailto:andre.coetzer@rabiesalliance.org)

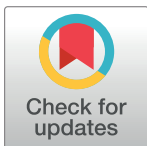

## OPEN ACCESS

**Citation:** Spargo RM, Coetzer A, Makuvadze FT, Chikerema SM, Chiwerere V, Bhara E, et al. (2021) Knowledge, attitudes and practices towards rabies: A survey of the general population residing in the Harare Metropolitan Province of Zimbabwe. PLoS ONE 16(1): e0246103. <https://doi.org/10.1371/journal.pone.0246103>

**Editor:** Simon Clegg, University of Lincoln, UNITED KINGDOM

**Received:** July 9, 2020

**Accepted:** January 13, 2021

**Published:** January 28, 2021

**Copyright:** © 2021 Spargo et al. This is an open access article distributed under the terms of the [Creative Commons Attribution License](https://creativecommons.org/licenses/by/4.0/), which permits unrestricted use, distribution, and reproduction in any medium, provided the original author and source are credited.

**Data Availability Statement:** The survey data file is available from the Open Science Framework database (<https://osf.io/hmy9q>).

**Funding:** The authors received no specific funding for this work.

**Competing interests:** The authors have declared that no competing interests exist.

## Abstract

### Background

Rabies remains endemic to the Harare Metropolitan Province of Zimbabwe, with a lack of public participations potentially contributing to the limited success in eliminating the disease. We hypothesized that rabies intervention campaigns were less successful than they could be as a result of poor understanding of the disease at the community level, and thus aimed to identify the knowledge, attitudes, and practices towards rabies in the province.

### Methods

A cross-sectional survey, using a semi-structured questionnaire, was implemented between January 2017 and June 2018 across the province and data were collected from 798 respondents. Frequency distributions and logistic regressions were undertaken to determine the factors associated with the adequacy of the prevailing rabies knowledge, pet ownership characteristics and the existing preventative practices.

### Results

The results of our study suggested that the majority of the respondents (92%) had heard of rabies. However, the level of rabies knowledge could be classified as “adequate” in only 36% of respondents. The multivariate logistic regression analysis indicated that pet ownership and type of occupation were statistically associated with a better understanding and knowledge of the disease. Of all the respondents, 49% owned at least one dog or cat and suburb density and occupation were statistically associated with owning a pet. Amongst the pet owners, 57% consulted an animal health practitioner at least once a year and 75% were aware of a rabies vaccine for their pets. The multivariate logistic regression analysis

indicated that age, education and gender were statistically associated with pet owners taking their pet(s) to an animal clinic.

## Conclusion

This study showed that the majority of the respondents lacked comprehensive knowledge about rabies, with the knowledge pertaining to health seeking behaviour and the importance of rabies vaccination being the most lacking. Additional public education relying on key messages, aimed at the different target audiences, is required in the province.

## Introduction

Rabies, caused primarily by the *Rabies lyssavirus* (RABV), is a neglected zoonotic disease that is transmitted mainly by domestic dogs (*Canis familiaris*) [1]. Dogs, which account for 99% of all human rabies cases, most significantly affect human populations in developing countries in Asia and Africa [2]. Despite being a vaccine preventable disease in humans and animals [1], the most recent predictive burden models estimate that rabies still kills more than 59,000 people globally every year [2]. In the rabies-endemic country of Zimbabwe, it is estimated that more than 400 people succumb to dog-mediated rabies annually [2]. Although these human rabies cases are mostly limited to the rural areas of the country, rabies was first detected in Zimbabwe's most densely populated urban province (the Harare Metropolitan Province (HMP)) in 2010 [3]. Since then, it had become endemic and 459 animal rabies cases had been recorded within the province between 2010 and 2019 [4].

In an effort to control and eliminate rabies within the province, both dog vaccination campaigns (reaching between 6% and 12% of the province's estimated dog population in 2018 and 2019 respectively) and general community awareness activities were implemented by the Ministry of Agriculture [4, 5]. In support of these efforts, a study aimed at gaining an improved understanding of the epidemiology of the disease transmission in the province found that approximately 80% of the rabies-positive samples had been collected from dogs that had been "owned, but unvaccinated" animals. As such, the owners should have, by law, had their companion animals vaccinated against rabies every year [3, 6].

Considering the endemicity of rabies in the HMP and the apparent ignorance regarding the legal requirement and the value of dog vaccination in the prevention of human rabies, it would be prudent to enhance public awareness with regards to rabies transmission, clinical signs, prevention and control. As a first step towards creating specific educational and awareness plans, the aim of this study was to undertake a knowledge, attitude and practice (KAP) survey in the HMP using a cross-sectional questionnaire. The findings of such a survey would enable stakeholders to determine existing knowledge gaps within the population, enabling community-based targeted communication strategies to be developed and implemented in the future.

## Methods

### Ethical considerations

Permission to conduct the research was granted by the Ethics and Animal Welfare Sub-committee of the Department of Veterinary Services (DVS) (Approval number: 009/2018). The Research Ethics Committee (Faculty of Health Sciences, University of Pretoria, South Africa) approved the planned retrospective analysis of the data in the study (Approval number: 68/2019).



levels were surveyed [7]. The cross-sectional study, relying on a semi-structured questionnaire (S1 File), was conducted from January 2017 to June 2018 at community gathering points (e.g. shopping centres, community gardens, etc.) and households within each selected suburb in the province.

The pre-testing of the questionnaire was done in three suburbs of the study area, with 15 surveys undertaken during the pre-testing phase. No further alterations were required to the questionnaire and the survey was subsequently implemented across the HMP. During the face to face interviews, the respondents were randomly selected at the various sampling locations before the purpose of the study was explained in detail by the survey facilitator. While no sub-populations were specifically targeted during the simple random study, individuals younger than the age of 16 were included in the study—permitting that their legal guardian also gave consent. With children younger than 15 years accounting for approximately 40% of all human rabies cases in Africa and Asia [9], the inclusion of minors in our study ensured that one of the most at-risk sub-populations was included in the investigation.

Upon commencing the study, adults who gave their verbal consent to participate in the study were interviewed in either English or Shona and the answers were documented. After completing the survey, the respondent signed the completed questionnaire with their name and surname. In the case of minors (individuals younger than 16 years of age), both the legal guardian and minor gave verbal consent for the minor respondent to participate in the study. After the final answers had been captured, both the minor respondent and legal guardian signed the completed questionnaire with their names and surnames. Individuals who did not wish to participate—and thus did not give verbal consent—were omitted from the study and not interviewed. All information obtained from the questionnaire was treated as private and confidential at all times.

Instead of calculating the required sample size before the onset of the study, the survey was implemented across the province and the final sample size was scrutinized in terms of sufficiency. To this end, the confidence interval was determined using a website-based sample size calculator (<https://www.surveysystem.com/sscalc.htm>). By setting the confidence level at 95% and assuming that 50% (default) of the population would have knowledge and awareness about rabies, the confidence interval was determined to be 3.5. This was deemed to be sufficiently small and no further sampling was required.

## Statistical analysis

Data collected from each questionnaire was captured in excel, filtered, checked for completeness and exported into STATA version 14 (College Corporation Station, TX, USA), after which a descriptive analysis was conducted for the entire dataset.

To determine the “knowledge about rabies” predictor variables, respondents were categorized as having either an “adequate” or “inadequate” knowledge about rabies by using a method described elsewhere [10]. Briefly, respondents were assessed based on their ability to answer five key questions designed to assess their knowledge about rabies, viz. i) identify notable signs in rabid animals, ii) identify a potential reservoir species for rabies, iii) identify at least one mode of rabies transmission, iv) mention the appropriate health seeking behaviour after an exposure has occurred, and v) mention the appropriate course of action to be taken with a suspect rabid animal after someone has come into contact with it. A respondent’s knowledge of rabies was considered adequate if they correctly answered all five questions. Likewise, if a respondent answered any of the five questions incorrectly, or could not answer a question, their rabies knowledge was considered inadequate (S1 Table).

The socio-demographic characteristics were summarised and the adequacy of rabies knowledge, pet ownership characteristics and practices towards rabies control were examined using

logistic regression modelling. Firstly, a univariable logistic regression analysis was used to calculate the odds ratios (ORs) and the corresponding 95% confidence intervals (CI) for the various socio-demographic characteristics. Following on from this, a forward stepwise multivariate logistic regression analysis was undertaken as described elsewhere [10]. Briefly, the selection of predictor variables for the multivariate logistic regression analysis was determined using the likelihood ratio test, with only predictor variables that had a p-value of  $\leq 0.2$  being included in the final model. The multivariate logistic regression analysis was undertaken by adding the significant predictor variables with the smallest p-value first. The remaining significant predictor variables were subsequently added in a stepwise manner and the predictor variables with a p-value of  $< 0.05$  were retained in the model. In order to assess confounding effects, predictor variables that were not selected for the final logistic regression model were added and if the coefficient of the predictor variables changed by more than 25%, the additional variable was deemed to have a confounding effect. No such confounders were, however, detected in this study. Lastly, adjusted OR and their corresponding 95% CIs were derived from the final multivariate logistic regression model.

## Results

### Socio-demographic characteristics

The socio-demographic characteristics of the 798 respondents included in the study are summarized in Table 1. Of all respondents, 49.87% were female and 50.13% were male, with 42% of the respondents falling in the 13–18 years age bracket and 56% of the respondents originating from high density suburbs. Lastly, while various occupations were randomly surveyed, students (69%), teachers (10%) and healthcare professionals (2%) were occupations that appeared most frequently and were thus included in the analyses (Table 1).

### Knowledge about rabies

Of all respondents, 92% (735/798) had heard of “rabies”, while 80% of the respondents that knew of rabies also knew that dogs could get infected and 76% knew that dogs could spread the disease to humans. Of the 735 respondents that knew of rabies, 89% (653/735) correctly listed a mode of transmission associated with rabies (e.g. biting or exposure to infected saliva), while 88% (647/735) could list the correct course of action to take after being exposed to a suspect rabid animal (e.g. wound washing, seeking primary healthcare). Furthermore, 71% (524/738) of the respondents that knew of rabies could list at least one clinical sign associated with animal rabies (e.g. salivation, change in behaviour, neurological abnormalities), while 66% (487/735) of the respondents knew what to do when suspecting an animal to be suffering from rabies (e.g. report to the nearest veterinarian, seek help from the local authorities) (Fig 2, Table 2).

Of all respondents, only 36% (286/798) had adequate knowledge about rabies according to our evaluation matrix (S1 Table). The multivariable regression analysis demonstrated that the predictor variables ‘pet ownership status’ and ‘occupation’ were both statistically associated with having adequate knowledge about rabies (Table 3). Respondents that owned a pet(s) had a 1.95 greater odds of having adequate knowledge about rabies compared to respondents who did not own pets (aOR: 1.95, 95% CI: 1.44–2.65). Compared to students, healthcare providers had a 9.81 greater odds of having adequate knowledge about rabies (aOR: 9.81, 95% CI: 2.78–34.68), while teachers had a 2.99 greater odds of having adequate knowledge about rabies (aOR: 2.99, 95% CI: 1.81–4.92).

In addition to determining whether respondents had an adequate knowledge of rabies, we also endeavoured to gain an improved understanding of which advocacy channels were the

**Table 1. Socio-demographic characteristics of the respondents included in the study.**

| Characteristic            | Frequency <i>n</i> (%) |
|---------------------------|------------------------|
| <b>Gender</b>             |                        |
| Female                    | 398 (49.87)            |
| Male                      | 400 (50.13)            |
| <b>Place of residence</b> |                        |
| Low density suburb        | 244 (30.58)            |
| Medium density suburb     | 111 (13.91)            |
| High density suburb       | 443 (55.51)            |
| <b>Level of education</b> |                        |
| Primary education         | 192 (24.06)            |
| High school               | 338 (42.36)            |
| Certificate               | 130 (16.29)            |
| Diploma                   | 66 (8.27)              |
| Degree                    | 72 (9.02)              |
| <b>Occupation</b>         |                        |
| Student                   | 553 (69.30)            |
| Teacher                   | 78 (9.77)              |
| Health professional       | 18 (2.26)              |
| Other                     | 149 (18.67)            |
| <b>Age</b>                |                        |
| <13                       | 192 (24.06)            |
| 13–18                     | 342 (42.86)            |
| 19–24                     | 43 (5.39)              |
| 25–30                     | 122 (15.29)            |
| >30                       | 99 (12.41)             |
| <b>Pet owner</b>          |                        |
| Yes                       | 395 (49.50)            |
| No                        | 403 (50.50)            |

<https://doi.org/10.1371/journal.pone.0246103.t001>

most effective within the sampled population. Of all the respondents who knew of rabies ( $n = 735$ ), 23% could list no specific source of information, while 54% got the information from mass media (Television and Radio). Seven percent obtained the information from animal health professionals, while 3% and 13% sourced information about rabies from human health professionals and schools, respectively (Table 2).

### Pet ownership characteristics

Of the 798 respondents, 49% (395/798) were pet owners (e.g. owning a dog or a cat) (Table 2). The multivariable regression analysis demonstrated that the variables ‘occupation’ and ‘suburb density’ were both strongly associated with owning a pet (Table 4). The odds of respondents that resided in high density suburbs owning a pet was 0.59 lower compared to respondents who resided in the low density suburbs (aOR: 0.59, 95% CI: 0.43–0.82). Compared to students, teachers had a 3.12 greater odds of owning a pet (aOR: 3.12, 95% CI: 1.84–5.32), while “other” occupations had a 2.04 greater odds of owning a pet (aOR: 2.04, 95% CI: 1.41–2.96).

### Practices of rabies control

Regarding means of controlling rabies, 61% and 9% of all respondents ( $n = 798$ ) could list dog vaccinations and both prophylactic vaccination in humans as well as dog vaccination,

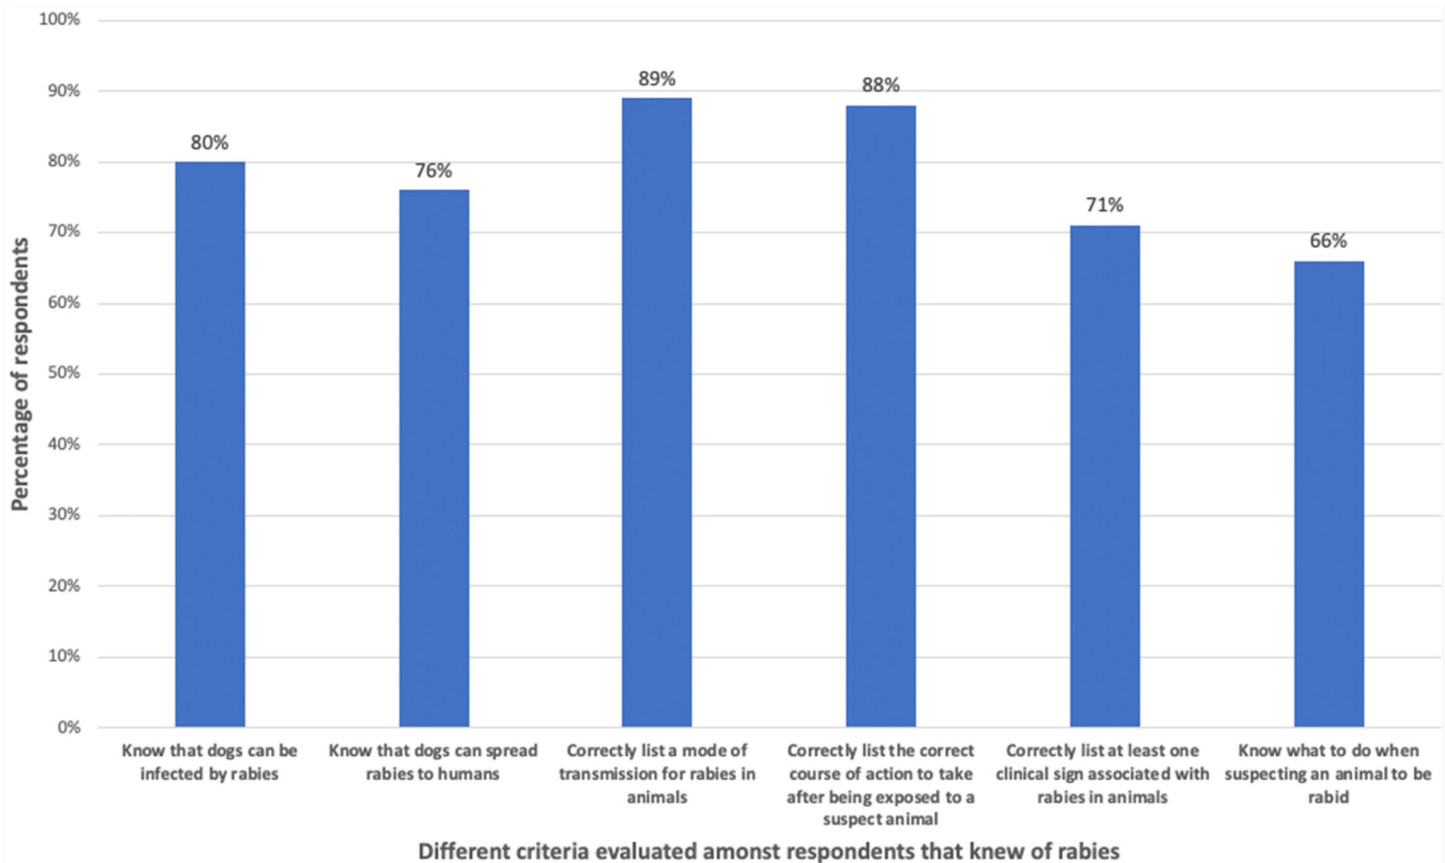

**Fig 2. Knowledge of respondents that knew of rabies, disaggregated by different knowledge criteria.**

<https://doi.org/10.1371/journal.pone.0246103.g002>

respectively. Furthermore, 51% (410/798) of the respondents were aware of specific legislation requiring the annual vaccination of dogs (Table 5). When investigating the pet owner subgroup specifically ( $n = 395$ ), 62% (245/395) could list dog vaccinations as means to control rabies and 13% (50/395) could list both prophylactic vaccination in humans as well as dog vaccination as a means to control rabies. In addition, 52% (204/395) of the respondents that owned pets were aware of specific legislation pertaining to animal vaccination (Table 5).

Of the 395 respondents that were pet owners, 60% (236/395) reported taking their pet(s) to a veterinary office. Within this group, 7% (17/236), 20% (46/236) and 70% (164/236) reported monthly, biannual, and annual veterinary visits respectively. The rest of pet owners who took their pets to a veterinary office (4%) could not recall the frequency (Table 5).

The multivariable regression analysis demonstrated that the variables 'level of education', 'age' and 'gender' were strongly associated with pet owners taking their pet(s) to an animal health professional at least once (Table 6). The odds of males taking their pet(s) to an animal health professional was 1.88 greater compared to females (aOR: 1.88, 95% CI: 1.21–2.91). Compared to respondents with a primary school education, respondents with a high school qualification had a 2.06 greater odds of taking their pet(s) to an animal health professional (aOR: 2.06, 95% CI: 1.16–3.65); respondents with a diploma had a 4.12 greater odds of taking their pet(s) to an animal health professional (aOR: 4.12, 95% CI: 1.86–9.12); and respondents with a degree had a 11.56 greater odds of taking their pet(s) to an animal health professional (aOR: 11.56, 95% CI: 4.36–30.68). Compared to respondents under the age of 13 years,

Table 2. Knowledge of rabies in the study sample.

| Characteristic                                                                                                                | Frequency <i>n</i><br>(%) |
|-------------------------------------------------------------------------------------------------------------------------------|---------------------------|
| <b>Number of respondents that had heard of rabies.</b>                                                                        |                           |
| Yes                                                                                                                           | 735 (92.11)               |
| No                                                                                                                            | 63 (7.89)                 |
| <b>Number of respondents that listed rabies as a disease that could infect dogs.</b>                                          |                           |
| None                                                                                                                          | 166 (20.80)               |
| Rabies                                                                                                                        | 404 (50.63)               |
| Rabies and other disease(s)                                                                                                   | 186 (23.31)               |
| Other disease(s) (excluding rabies)                                                                                           | 42 (5.26)                 |
| <b>Number of respondents that listed rabies as a disease transmitted to humans by dogs.</b>                                   |                           |
| None                                                                                                                          | 235 (29.45)               |
| Rabies                                                                                                                        | 490 (61.40)               |
| Rabies and other disease(s)                                                                                                   | 68 (8.52)                 |
| Other disease(s) (excluding rabies)                                                                                           | 5 (0.63)                  |
| <b>Number of respondents that could list the mode(s) of transmission for rabies.</b>                                          |                           |
| None                                                                                                                          | 145 (18.22)               |
| Dog bites                                                                                                                     | 607 (76.26)               |
| Dog bite, licking wounds                                                                                                      | 46 (5.53)                 |
| <b>Number of respondents that could list the appropriate health seeking behavior after being exposed to a suspect animal.</b> |                           |
| None                                                                                                                          | 53 (6.64)                 |
| Wash the wound with antiseptic                                                                                                | 89 (11.15)                |
| Wash with wound water                                                                                                         | 67 (8.40)                 |
| Go to the nearest clinic / veterinarian                                                                                       | 388 (48.62)               |
| Go to the police                                                                                                              | 47 (5.89)                 |
| Inform the owner                                                                                                              | 51 (6.39)                 |
| A combination of the actions                                                                                                  | 103 (12.91)               |
| <b>Number of respondents that could list the clinical signs of rabies in dogs.</b>                                            |                           |
| None                                                                                                                          | 274 (34.34)               |
| Salivation                                                                                                                    | 232 (29.07)               |
| Change in behavior (aggressive)                                                                                               | 116 (14.54)               |
| Neurological signs                                                                                                            | 43 (5.39)                 |
| A combination of clinical signs                                                                                               | 133 (16.67)               |
| <b>Number of respondents that could correctly identify the species affected by rabies.</b>                                    |                           |
| None                                                                                                                          | 67 (8.40)                 |
| Dog                                                                                                                           | 300 (37.59)               |
| Cat                                                                                                                           | 10 (1.25)                 |
| Cat and dog                                                                                                                   | 109 (13.66)               |
| Livestock                                                                                                                     | 12 (1.50)                 |
| Dog and livestock                                                                                                             | 22 (2.76)                 |
| Other warm-blooded mammals                                                                                                    | 5 (0.63)                  |
| Dog and other warm-blooded mammals                                                                                            | 161 (20.18)               |
| Cat and other warm-blooded mammals                                                                                            | 10 (1.25)                 |
| All warm-blooded mammals                                                                                                      | 67 (8.40)                 |
| Cat, dog and warm-blooded mammals                                                                                             | 35 (4.39)                 |
| <b>Number of respondents that knew the appropriate course of action when encountering a suspect rabid animal.</b>             |                           |
| None                                                                                                                          | 76 (9.52)                 |

(Continued)



Table 2. (Continued)

| Characteristic                          | Frequency <i>n</i> (%) |
|-----------------------------------------|------------------------|
| Report to the nearest veterinarian      | 280 (35.09)            |
| Report to the police                    | 118 (14.79)            |
| Kill the dog                            | 201 (25.19)            |
| Other                                   | 34 (4.26)              |
| A combination of the actions            | 89 (11.15)             |
| <b>Source of information on rabies</b>  |                        |
| None                                    | 235 (29.45)            |
| Media (television and/or radio)         | 389 (48.75)            |
| Veterinary personnel                    | 54 (6.77)              |
| Clinic/Medical personnel                | 23 (2.88)              |
| School (primary, secondary or tertiary) | 97 (12.16)             |

<https://doi.org/10.1371/journal.pone.0246103.t002>

respondents aged 13–18 had a 1.22 greater odds of taking their pet(s) to an animal health professional (aOR: 1.22, 95% CI: 1.07–1.39); respondents aged 25–30 had a 1.48 greater odds of taking their pet(s) to an animal health professional (aOR: 1.48, 95% CI: 1.27–1.72); and

Table 3. Univariate and multivariable logistic regression analysis of the association between the socio-demographic variables and “having adequate knowledge about rabies”.

| Variable             | Categories              | Adequate knowledge |     | Total | OR (95% CI)        | P Value  | aOR (95% CI)      |
|----------------------|-------------------------|--------------------|-----|-------|--------------------|----------|-------------------|
|                      |                         | Yes                | No  |       |                    |          |                   |
| Level of Education   | Primary education       | 51                 | 141 | 192   | Reference          |          |                   |
|                      | High school             | 114                | 224 | 338   | 1.40 (0.95–2.08)   | 0.0875   |                   |
|                      | Certificate             | 48                 | 82  | 130   | 1.62 (1.00–2.61)   | 0.0489   |                   |
|                      | Diploma                 | 41                 | 25  | 66    | 4.53 (2.50–8.19)   | < 0.0001 |                   |
|                      | Degree                  | 32                 | 40  | 72    | 2.21 (1.26–3.89)   | 0.0058   |                   |
| Age                  | <13                     | 51                 | 141 | 192   | Reference          |          |                   |
|                      | 13–18                   | 118                | 224 | 342   | 1.46 (0.99 - 2.15) | 0.0590   |                   |
|                      | 19–24                   | 11                 | 32  | 43    | 0.95 (0.47–2.02)   | 0.8950   |                   |
|                      | 25–30                   | 63                 | 59  | 122   | 2.95 (1.83–4.76)   | < 0.0001 |                   |
|                      | >30                     | 43                 | 56  | 99    | 2.12 (1.27–3.54)   | 0.0038   |                   |
| Occupation           | Student                 | 174                | 379 | 553   | Reference          |          | Reference         |
|                      | Teacher                 | 48                 | 30  | 78    | 3.49 (2.13–5.69)   | < 0.0001 | 2.99 (1.81–4.92)  |
|                      | Healthcare professional | 15                 | 3   | 18    | 10.89 (3.11–38.10) | 0.0002   | 9.81 (2.78–34.68) |
|                      | Other                   | 49                 | 100 | 149   | 1.07 (0.73–1.57)   | 0.7409   | 0.95 (0.64–1.41)  |
| Pet ownership status | No                      | 110                | 285 | 395   | Reference          |          | Reference         |
|                      | Yes                     | 176                | 227 | 403   | 2.01 (1.50–2.70)   | <0.0001  | 1.95 (1.44–2.65)  |
| Suburb density       | Low                     | 77                 | 167 | 244   | Reference          |          |                   |
|                      | Medium                  | 36                 | 75  | 111   | 1.04 (0.64 - 1.68) | 0.8697   |                   |
|                      | High                    | 173                | 270 | 443   | 1.39 (0.99 - 1.93) | 0.0511   |                   |
| Gender               | Female                  | 147                | 251 | 398   | Reference          |          |                   |
|                      | Male                    | 139                | 261 | 400   | 1.10 (0.82 - 1.47) | 0.5200   |                   |

OR: Odds Ratio

aOR: Adjusted Odds Ratio

CI: Confidence interval.

<https://doi.org/10.1371/journal.pone.0246103.t003>

**Table 4. Univariate and multivariable logistic regression analysis of the association between the socio-demographic variables and “owning a pet”.**

| Variable           | Categories              | Pet ownership |     | Total | OR (95% CI)        | P value  | aOR (95% CI)     |
|--------------------|-------------------------|---------------|-----|-------|--------------------|----------|------------------|
|                    |                         | Yes           | No  |       |                    |          |                  |
| Level of Education | Primary education       | 75            | 117 | 192   | Reference          |          |                  |
|                    | High school             | 154           | 184 | 338   | 1.31 (0.91 - 1.87) | 0.1469   |                  |
|                    | Certificate             | 68            | 62  | 130   | 1.71 (1.09 - 2.68) | 0.0193   |                  |
|                    | Diploma                 | 46            | 20  | 66    | 3.59 (1.97 - 6.54) | < 0.0001 |                  |
|                    | Degree                  | 52            | 20  | 72    | 4.06 (2.24 - 7.33) | < 0.0001 |                  |
| Age                | <13                     | 75            | 117 | 192   | Reference          |          |                  |
|                    | 13–18                   | 154           | 188 | 342   | 1.28 (0.89 - 1.83) | 0.1816   |                  |
|                    | 19–24                   | 22            | 21  | 43    | 1.63 (0.84 - 3.18) | 0.1474   |                  |
|                    | 25–30                   | 76            | 46  | 122   | 2.58 (1.62 - 4.11) | 0.0001   |                  |
|                    | >30                     | 68            | 31  | 99    | 3.42 (2.05 - 5.72) | < 0.0001 |                  |
| Occupation         | Student                 | 238           | 315 | 553   | Reference          |          | Reference        |
|                    | Teacher                 | 55            | 23  | 78    | 3.17 (1.89 - 5.30) | < 0.0001 | 3.12 (1.84–5.32) |
|                    | Healthcare professional | 12            | 6   | 18    | 2.65 (0.98 - 7.15) | 0.0550   | 2.68 (0.98–7.29) |
|                    | Other                   | 90            | 59  | 149   | 2.02 (1.40 - 2.92) | 0.0002   | 2.04 (1.41–2.96) |
| Suburb density     | Low                     | 141           | 103 | 244   | Reference          |          | Reference        |
|                    | Medium                  | 63            | 48  | 111   | 0.96 (0.60 - 1.51) | 0.8556   | 1.07 (0.67–1.69) |
|                    | High                    | 191           | 252 | 443   | 0.55 (0.40 - 0.76) | 0.0002   | 0.59 (0.43–0.82) |
| Gender             | Female                  | 211           | 189 | 400   | Reference          |          |                  |
|                    | Male                    | 184           | 214 | 398   | 1.30 (0.98 - 1.71) | 0.0657   |                  |

OR: Odds Ratio

aOR: Adjusted Odds Ratio

CI: Confidence interval

<https://doi.org/10.1371/journal.pone.0246103.t004>

**Table 5. Knowledge of rabies prevention amongst respondents that did not own pets and pet owner.**

| Characteristic                                            | Respondents that did not own pets (n = 403) n (%) | Respondents that owned pets (n = 395) n (%) |
|-----------------------------------------------------------|---------------------------------------------------|---------------------------------------------|
| <b>Methods of rabies control</b>                          |                                                   |                                             |
| None                                                      | 130 (32.26)                                       | 82 (20.76)                                  |
| Dog vaccination                                           | 240 (59.55)                                       | 245 (62.03)                                 |
| Prophylactic vaccination in humans and dog vaccination    | 23 (5.71)                                         | 50 (12.66)                                  |
| Confinement of pets and elimination of strays             | 10 (2.48)                                         | 18 (4.56)                                   |
| <b>Knowledge of pet legislation</b>                       |                                                   |                                             |
| Yes                                                       | 206 (51.12)                                       | 204 (51.65)                                 |
| No                                                        | 197 (48.88)                                       | 191 (48.35)                                 |
| <b>Taking pet(s) to a veterinary office</b>               |                                                   |                                             |
| Yes                                                       | —                                                 | 236 (59.75)                                 |
| No                                                        | —                                                 | 159 (40.25)                                 |
| <b>Regularity of taking pet(s) to a veterinary office</b> |                                                   |                                             |
| Weekly                                                    | —                                                 | 0 (0.00)                                    |
| Monthly                                                   | —                                                 | 17 (7.20)                                   |
| Biannual                                                  | —                                                 | 46 (19.49)                                  |
| Annual                                                    | —                                                 | 164 (69.49)                                 |
| Unsure                                                    | —                                                 | 9 (3.81)                                    |

<https://doi.org/10.1371/journal.pone.0246103.t005>

**Table 6. Univariate and multivariable logistic regression analysis of the association between the socio-demographic variables and “pet owners seeking animal health services”.**

| Variable           | Categories              | Pet owner visiting a veterinarian |     | Total | OR (95% CI)           | P Value  | aOR (95% CI)       |
|--------------------|-------------------------|-----------------------------------|-----|-------|-----------------------|----------|--------------------|
|                    |                         | Yes                               | No  |       |                       |          |                    |
| Level of Education | Primary education       | 29                                | 46  | 75    | Reference             |          | Reference          |
|                    | High school             | 90                                | 64  | 154   | 2.23 (1.27 - 3.92)    | 0.0053   | 2.06 (1.16–3.65)   |
|                    | Certificate             | 39                                | 29  | 68    | 2.13 (1.09 - 4.16)    | 0.0263   | 1.94 (0.98–3.82)   |
|                    | Diploma                 | 32                                | 14  | 46    | 3.63 (1.66 - 7.92)    | 0.0012   | 4.12 (1.86–9.12)   |
|                    | Degree                  | 46                                | 6   | 52    | 12.16 (4.61 - 32.06)  | < 0.0001 | 11.56 (4.36–30.68) |
| Age                | <13                     | 29                                | 46  | 75    | Reference             |          | Reference          |
|                    | 13–18                   | 90                                | 64  | 154   | 1.49 (0.83 - 2.66)    | 0.1823   | 1.22 (1.07–1.39)   |
|                    | 19–24                   | 11                                | 11  | 22    | 1.59 (0.61 - 4.13)    | 0.3444   | 1.12 (0.89–1.40)   |
|                    | 25–30                   | 59                                | 17  | 76    | 5.51 (2.70 - 11.22)   | < 0.0001 | 1.48 (1.27–1.72)   |
|                    | >30                     | 47                                | 21  | 68    | 3.55 (1.77 - 7.10)    | 0.0003   | 1.36 (1.16–1.59)   |
| Current occupation | Student                 | 238                               | 315 | 553   | Reference             |          |                    |
|                    | Teacher                 | 55                                | 23  | 78    | 1.64 (0.90 - 3.00)    | 0.1109   |                    |
|                    | Healthcare professional | 12                                | 6   | 18    | 23.38 (1.37 - 399.42) | 0.02595  |                    |
|                    | Other                   | 90                                | 59  | 149   | 2.57 (1.51 - 4.38)    | 0.0005   |                    |
| Gender             | Female                  | 96                                | 88  | 184   | Reference             |          | Reference          |
|                    | Male                    | 140                               | 71  | 211   | 1.80 (1.20 - 2.71)    | 0.0043   | 1.88 (1.21–2.91)   |
| Suburb density     | Low                     | 87                                | 54  | 141   | Reference             |          |                    |
|                    | Medium                  | 36                                | 27  | 63    | 0.83 (0.45 - 1.51)    | 0.5389   |                    |
|                    | High                    | 113                               | 78  | 191   | 0.90 (0.58 - 1.40)    | 0.6403   |                    |

OR: Odds ratio

aOR: Adjusted odds ratio

CI: Confidence interval

<https://doi.org/10.1371/journal.pone.0246103.t006>

respondents that were 30 years and older had a 1.36 greater odds of taking their pet(s) to an animal health professional (aOR: 1.36, 95% CI: 1.16–1.59).

## Discussion

The prevention and control of rabies should be of the utmost importance, with evidence provided elsewhere showcasing successful control and even the feasibility of elimination [1, 11, 12]. Achieving rabies elimination does, however, not only rely on vaccinating a significant proportion of the at-risk dog population, but on other complimentary activities as well [13]. Amongst those activities, “enhanced education and awareness” is considered one of the crucial elements [13]. In support of this, studies from India, Ethiopia and Tanzania among others, bear testimony to the direct correlation between enhanced public knowledge, a change in attitudes and practices, and the ultimate decrease of rabies burden in affected areas [14–16].

In order to gain an improved understanding of the knowledge of rabies and its control within the HMP, we undertook a province-wide KAP survey focusing on rabies specifically. This was, to the best of our knowledge, the first rabies-specific KAP survey conducted in Zimbabwe and has provided valuable insight in terms of the prevailing rabies knowledge, pet ownership characteristics and practices towards rabies control amongst respondents residing in the HMP.

The result of our study suggested that only 36% of the 798 respondents included in our study had an adequate knowledge of rabies, which was similar to what was observed in Uganda

(41%) [17] but lower than findings reported from elsewhere in Africa, *viz.* Nigeria (82%) [18], Ethiopia (56%) [19], Rwanda (56%) [20], Kenya (67%) [21], and Tanzania (96%) [16]. Our findings suggested that the lack of adequate knowledge could be attributed to most of the participants having a good general knowledge of rabies, but lacking the comprehensive knowledge required to be truly knowledgeable about the disease and its prevention or control. For example, the majority of the respondents knew that dogs could get rabies and that dogs transmitted rabies to humans, but very few could adequately answer questions pertaining wound treatment and post-exposure prophylaxis (PEP). In evidence of the fact, our survey suggested that approximately 20% of the respondents mentioned wound washing as a component of wound treatment and only 9% of the respondents were able to list PEP for humans as a way to prevent rabies. While worrisome, these observations were not unique to our study. Similar findings were observed elsewhere on the African continent where several studies also found that the lack of knowledge of post exposure treatment was one of the most significant deficiencies in the knowledge profile of respondents [15–18, 20, 22, 23].

Furthermore, our findings suggested that only the predictor variables ‘Occupation’ and ‘Pet ownership status’ were strongly associated with having an adequate knowledge of rabies. These observations were similar to those observed in Ethiopia and Nigeria [18, 19], but were also in contradiction to those observed in Rwanda where pet ownership and occupation—along with sex and location—were not strongly associated with rabies knowledge [20].

Considering advocacy channels amongst the respondents that knew of rabies, media sources such as TV and radio were the most used methods (54%), while advice from skilled animal and human health professionals were much lower (7% and 3% respectively). These observations were similar to those observed in India, Rwanda and Uganda where it was reported that mass media was one of the main source of rabies information [17, 20, 24], but were also in contradiction to those observed in Bangladesh where physicians and governmental representatives were the major sources of rabies information [25]. Indeed, medical personnel and veterinarians should, in principle, play a significant role in the dissemination of rabies information, whereas our study suggested that it was not the case in the HMP. In addition, teachers also need to be utilized more effectively. Despite being three times more likely to have adequate knowledge compared to school children, only 13% of the respondents in our study that knew of rabies considered teachers a source of rabies knowledge. A similar observation was found in Ethiopia where only 11% of the respondents considered teachers a source of rabies knowledge—illustrating the need to empower teachers so that they can adequately educate children who are in their formative years. To this end, teachers and tertiary educators would need to be provided with appropriate lesson plans. In evidence of the effectiveness of this approach, the government of the Philippines had incorporated rabies awareness into their official school curriculum—with the life-saving information reaching an estimated 24 million children every year [26].

In light of the strong association between pet ownership and rabies knowledge observed in our study, we endeavoured to gain a better understanding of pet owner characteristics within the HMP. Our results showed that 49% of the respondents within the HMP were pet owners (owning a cat, a dog or a combination of the two). This level of pet ownership was similar to what was observed in other studies in Africa, where pet ownership was reportedly between 40% and 58% [17–19]. Within the pet owner sub-population specifically, 60% of the respondents within the HMP reported taking their pet(s) to a veterinary office. Ninety-six percent of those respondents visited an animal health professional at least once a year, while 75% could list either dog vaccination or dog vaccination and human PEP as a means to control rabies. While respondents in our study were never specifically asked whether they had their pets vaccinated at any point in time, these observations would suggest that approximately 43% of the

owned dog population should theoretically have received their annual vaccination against rabies every year. Assuming this to be accurate, the results would be similar to findings from Uganda [17] and Kenya [21] where a low percentage of respondents (between 35% and 43%) reported having their pets vaccinated against rabies, and in contradiction to findings from Nigeria [18], Ethiopia [19] and Rwanda [20] where a much higher percentage of respondents (between 74% and 94%) reported having their pets vaccinated against rabies. Furthermore, this speculative vaccination coverage in the HMP (30%) is well below the recommended vaccination coverage of 70% [1], which could explain the persistence of the disease in the province.

As could be expected from a non-longitudinal observational study, our study did have some limitations. Since the official declaration of the rabies outbreak in 2016, educational and awareness campaigns had been coupled with disease intervention activities across the province. With these educational activities striving to provide people with the basic knowledge about rabies, they could have resulted in a bias in the information presented here—especially in terms of knowledge pertaining to the role that dog vaccination plays in preventing rabies. Furthermore, despite relying on randomly selected participants, the study inadvertently disproportionately sampled specific sub-populations (e.g. teachers and students), which could have influenced the findings of the study. Lastly, the responses could have been biased by the open-ended nature of some of the questions (questions that allowed respondents to give a free-form answer), with the investigators subconsciously guiding the respondent's answers. Nevertheless, the results presented here did provide valuable insight into the prevailing knowledge, attitudes and practices amongst people living in the HMP.

## Conclusion

This study demonstrated that most people residing in the HMP had a basic general knowledge of rabies. However, an overall lack of comprehensive knowledge was noted in most of the population. By developing and implementing a well-structured Information, Education and Communication (IEC) plan for the HMP—using new and existing advocacy channels to target both the general population and pet owners with specific messages like “vaccinate your pet(s) against rabies”, “immediately wash any animal bites and scratches with soap and running water”, and “get rabies vaccination at your nearest healthcare facility if you have been exposed to an animal bite or scratch”—rabies control activities could become more effective and far reaching, in-turn preventing the needless loss of human and animal lives across the province and beyond.

## Supporting information

**S1 Checklist. Strobe checklist.**

(PDF)

**S1 File. Questionnaire used during the KAP survey of the general population residing in the Harare Metropolitan Province.**

(PDF)

**S1 Table. Results of the evaluation matrix that assessed respondent's rabies knowledge.**

(PDF)

## Acknowledgments

The authors wish to thank Professor D. Pfukenyi, Dr S. Dhliwayo and Dr M. Nyagura from the Faculty of Veterinary Science for their support and guidance during the study.

## Author Contributions

**Conceptualization:** Reverend M. Spargo, Andre Coetzer.

**Data curation:** Reverend M. Spargo, Francis T. Makuvadze, Sylvester M. Chikerema, Vaida Chiwerere, Esnath Bhara.

**Formal analysis:** Reverend M. Spargo, Andre Coetzer, Francis T. Makuvadze, Sylvester M. Chikerema.

**Investigation:** Reverend M. Spargo, Francis T. Makuvadze, Vaida Chiwerere, Esnath Bhara.

**Methodology:** Reverend M. Spargo, Andre Coetzer.

**Project administration:** Reverend M. Spargo, Louis H. Nel.

**Resources:** Reverend M. Spargo, Francis T. Makuvadze, Vaida Chiwerere, Esnath Bhara.

**Supervision:** Reverend M. Spargo, Louis H. Nel.

**Writing – original draft:** Reverend M. Spargo, Andre Coetzer, Sylvester M. Chikerema.

**Writing – review & editing:** Francis T. Makuvadze, Louis H. Nel.

## References

1. World Health Organization. WHO Expert Consultation on Rabies, third report. WHO Technical Report Series. Geneva; 2018.
2. Hampson K, Coudeville L, Lembo T, Sambo M, Kieffer A, Atllan M, et al. Estimating the Global Burden of Endemic Canine Rabies. *PLoS Negl Trop Dis*. 2015; 9: e0003709. <https://doi.org/10.1371/journal.pntd.0003786> PMID: 25881058
3. Coetzer A, Gwenzure L, Makaya P, Markotter W, Nel L. Epidemiological aspects of the persistent transmission of rabies during an outbreak (2010–2017) in Harare, Zimbabwe. *PLoS One*. 2019; 14: e0210018. Editor: <https://doi.org/10.1371/journal.pone.0210018> PMID: 30629634
4. Global Alliance for Rabies Control. Rabies Epidemiological Bulletin (REB) [Internet]. 2019 [cited 13 Jun 2019]. Available: <https://rabiesalliance.org/capacity-building/reb>
5. Coetzer A, Scott TP, Noor K, Gwenzure LF, Nel LH. A Novel Integrated and Labile eHealth System for Monitoring Dog Rabies Vaccination Campaigns. *Vaccines*. 2019; 7: 1–15. <https://doi.org/10.3390/vaccines7030108> PMID: 31505844
6. Parliament of Zimbabwe. Animal Health Act (Chapter 19:01) [Internet]. Zimbabwe; 2001. Available: <http://extwprlegs1.fao.org/docs/pdf/zim21477.pdf>
7. Zimbabwe National Statistics Agency. Zimbabwe Population Census 2012 [Internet]. 2012. Available: <http://www.zimstat.co.zw/wp-content/uploads/publications/Population/population/census-2012-national-report.pdf>
8. Brooks R. Survey of the dog population of Zimbabwe and its level of rabies vaccination. *Vet Rec*. 1990; 27: 592–596. PMID: 2075689
9. World Health Organization. Rabies vaccines: WHO position paper—April 2018. *Wkly Epidemiol Rec / Elev épidémiologique Hebd*. 2018; 16: 201–220. <https://doi.org/10.1016/j.actatropica.2012.04.013> PMID: 22580511
10. Rinchen S, Tenzin T, Hall D, van der Meer F, Sharma B, Dukpa K, et al. A community-based knowledge, attitude, and practice survey on rabies among cattle owners in selected areas of Bhutan. *PLoS Negl Trop Dis*. 2019; 13: e0007305. <https://doi.org/10.1371/journal.pntd.0007305> PMID: 30933984
11. International Coordinating Group (ICG). Report of the sixth meeting of the International Coordinating Group of the World Health Organization and the Bill & Melinda Gates Foundation project on eliminating human and dog rabies [Internet]. Durban, South Africa; 2014. Available: <https://apps.who.int/iris/handle/10665/151809>
12. Lembo T, Hampson K, Kaare MT, Ernest E, Knobel DL, Kazwala RR, et al. The Feasibility of Canine Rabies Elimination in Africa: Dispelling Doubts with Data. *PLoS Negl Trop Dis*. 2010; 4: 1–9. <https://doi.org/10.1371/journal.pntd.0000626> PMID: 20186330

13. Banyard AC, Horton DL, Freuling C, Müller T, Fooks AR. Control and prevention of canine rabies: The need for building laboratory-based surveillance capacity. *Antiviral Res.* Elsevier B.V.; 2013; 98: 357–364. <https://doi.org/10.1016/j.antiviral.2013.04.004> PMID: 23603498
14. Kumar S. A preliminary survey of knowledge, attitudes and practice regarding rabies in West Bengal, India. *Sri Lankan J Infect Dis.* 2019; 9: 79–83. <https://doi.org/10.4038/sljid.v9i1.8233>
15. Dabuma T, Kabeta T, Mengist HM. Assessment of Basic Knowledge, Attitude and Practice of Community on Rabies and Retrospective Survey in and around Ambo Town, West Shoa Zone of Ethiopia. *J Med Microbiol Diagnosis.* 2017; 6. <https://doi.org/10.4172/2161-0703.1000263>
16. Sambo M, Lembo T, Cleaveland S, Ferguson HM, Sikana L, Simon C, et al. Knowledge, Attitudes and Practices (KAP) about Rabies Prevention and Control: A Community Survey in Tanzania. *PLoS Negl Trop Dis.* 2014; 8: e3310. <https://doi.org/10.1371/journal.pntd.0003310> PMID: 25473834
17. Omodo M, Ar Gouilh M, Mwiine FN, Okurut ARA, Nantima N, Namatovu A, et al. Rabies in Uganda: rabies knowledge, attitude and practice and molecular characterization of circulating virus strains. *BMC Infect Dis.* 2020; 20: 200. <https://doi.org/10.1186/s12879-020-4934-y> PMID: 32143593
18. Edukugho AA, Umoh JU, Diem M, Ajani O, Uba B, Okeke L, et al. Knowledge, attitudes and practices towards rabies prevention among residents of Abuja municipal area council, Federal Capital Territory, Nigeria. *Pan Afr Med J.* 2018; 31. <https://doi.org/10.11604/pamj.2018.31.21.15120> PMID: 30918548
19. Hagos WG, Muchie KF, Gebru GG, Mezgebe GG, Reda KA, Dachew BA. Assessment of knowledge, attitude and practice towards rabies and associated factors among household heads in Mekelle city, Ethiopia. *BMC Public Health.* 2020; 20. <https://doi.org/10.1186/s12889-020-8145-7> PMID: 31937297
20. Ntampaka P, Nyaga PN, Niragire F, Gathumbi JK, Tukei M. Knowledge, attitudes and practices regarding rabies and its control among dog owners in Kigali city, Rwanda. *PLoS One.* 2019; 14: e0210044. <https://doi.org/10.1371/journal.pone.0210044> PMID: 31430285
21. Mucheru GM, Kikvi GM, Amwayi SA. Knowledge and practices towards rabies and determinants of dog rabies vaccination in households: A cross sectional study in an area with high dog bite incidents in Kakamega County, Kenya, 2013. *Pan Afr Med J.* 2014; 19. <https://doi.org/10.11604/pamj.2014.19.255.4745> PMID: 25852798
22. Kabeta T, Deresa B, Tigre W, Ward MP, Mor SM. Knowledge, attitudes and practices of animal bite victims attending an anti-rabies health center in Jimma Town, Ethiopia. *PLoS Negl Trop Dis.* 2015; 9: e0003867. <https://doi.org/10.1371/journal.pntd.0003867> PMID: 26114573
23. Ngah Osoe Bouli F., Awah-Ndukum J, Tejiokem CM, Kilekoug, Mingoas J. Knowledge, attitudes and practices (KAP) evaluation regarding rabies in the Centre, Adamawa and North Regions of Cameroon. *J African Sci Vet Med.* 2018; 3: 176–183. <https://doi.org/10.31248/JASVM2018.114>
24. Herbert M, Basha S R, Thangaraj S. Community perception regarding rabies prevention and stray dog control in urban slums in India. *J Infect Public Health.* King Saud Bin Abdulaziz University for Health Sciences; 2012; 5: 374–380. <https://doi.org/10.1016/j.jiph.2012.05.002> PMID: 23287607
25. Ghosh S, Chowdhury S, Haider N, Bhowmik RK, Rana MS, Prue Marma AS, et al. Awareness of rabies and response to dog bites in a Bangladesh community. *Vet Med Sci.* 2016; 2: 161–169. <https://doi.org/10.1002/vms3.30> PMID: 29067191
26. Global Alliance for Rabies Control. Over 24 million school children to benefit from GARC's work in the Philippines [Internet]. 2020 [cited 20 Mar 2020]. Available: <https://rabiesalliance.org/news/over-24-million-school-children-benefit-garcs-work-philippines>
