# Supplementary material for: Knowledge, attitudes and practices towards rabies: A survey of the general population residing in the Harare Metropolitan Province of Zimbabwe
Source: PubMed Central journal article supplement (PMC7842990; doi:10.1371/journal.pone.0246103), 2021-01-28
Supplement: pone.0246103.s002.pdf [file pone.0246103.s002.pdf]

**Questionnaire 1: KAP survey of general population residing in the Harare Metropolitan Province**

Suburb .....

**1. Personal details**

1. Gender

Female       Male

2. Highest education obtained:

Not completed high school       High school  
 Certificate       Diploma  
 Degree

3. Occupation

Student       Teacher  
 Health professional       Other

4. Age

Below 13       13 -18 years  
 19- 24 years       25-30 years  
 Above 30 years

5. Do you own a pet or pets?

Yes       No

6. If yes, list them

## **2. Disease information**

7. Do you know any diseases that may affect dogs?

Yes                       No

8. List some of the diseases that affect dogs

9. Do you know any diseases that can be transmitted from dogs to humans?

Yes                       No

10. List some of the diseases that can be transmitted from dogs to human beings

11. Have you ever heard of rabies?

Yes                       No

If yes, by whom?

12. Have there been reported rabies cases in your area?

13. How is Rabies transmitted?

14. List some of the animals that can be infected by rabies

15. Do you know the clinical signs of rabies?

Yes                       No

16. If yes, list them

17. Do you know anyone who has been bitten by a dog?

Yes                       No

18. What steps do you take when someone is bitten by a dog?

19. What do you do to the dog suspected of having rabies?

20. Have you ever visited a veterinarian?

Yes                       No

21. Do you know methods for controlling rabies?

Yes                       No

If yes, list them

22. How often do you take your pet(s) for vaccination?

23. Do you know any laws( by-laws) concerning the keeping of dogs
