# Supplementary material for: Knowledge, attitudes and practices towards rabies: A survey of the general population residing in the Harare Metropolitan Province of Zimbabwe
Source: PubMed Central journal article supplement (PMC7842990; doi:10.1371/journal.pone.0246103), 2021-01-28
Supplement: pone.0246103.s003.pdf [file pone.0246103.s003.pdf]

| Respondent | Modes of rabies transmission | Species affected by rabies | Examples of clinical signs | action taken after a dog bite | Action taken when suspecting rabies | FINAL outcome |
|------------|------------------------------|----------------------------|----------------------------|-------------------------------|-------------------------------------|---------------|
| 1          | FAIL                         | FAIL                       | FAIL                       | PASS                          | FAIL                                | Inadequate    |
| 2          | PASS                         | PASS                       | FAIL                       | PASS                          | FAIL                                | Inadequate    |
| 3          | PASS                         | PASS                       | PASS                       | PASS                          | FAIL                                | Inadequate    |
| 4          | PASS                         | PASS                       | PASS                       | PASS                          | FAIL                                | Inadequate    |
| 5          | PASS                         | PASS                       | FAIL                       | PASS                          | FAIL                                | Inadequate    |
| 6          | PASS                         | PASS                       | PASS                       | PASS                          | FAIL                                | Inadequate    |
| 7          | PASS                         | PASS                       | PASS                       | PASS                          | FAIL                                | Inadequate    |
| 8          | FAIL                         | PASS                       | PASS                       | PASS                          | PASS                                | Inadequate    |
| 9          | PASS                         | PASS                       | PASS                       | PASS                          | PASS                                | Adequate      |
| 10         | PASS                         | PASS                       | PASS                       | PASS                          | PASS                                | Adequate      |
| 11         | PASS                         | FAIL                       | FAIL                       | PASS                          | PASS                                | Inadequate    |
| 12         | PASS                         | PASS                       | PASS                       | PASS                          | FAIL                                | Inadequate    |
| 13         | PASS                         | PASS                       | PASS                       | PASS                          | FAIL                                | Inadequate    |
| 14         | PASS                         | PASS                       | PASS                       | PASS                          | FAIL                                | Inadequate    |
| 15         | PASS                         | PASS                       | PASS                       | PASS                          | FAIL                                | Inadequate    |
| 16         | PASS                         | PASS                       | FAIL                       | FAIL                          | FAIL                                | Inadequate    |
| 17         | PASS                         | PASS                       | PASS                       | PASS                          | PASS                                | Adequate      |
| 18         | PASS                         | PASS                       | FAIL                       | PASS                          | FAIL                                | Inadequate    |
| 19         | PASS                         | PASS                       | FAIL                       | PASS                          | PASS                                | Inadequate    |
| 20         | FAIL                         | PASS                       | FAIL                       | PASS                          | FAIL                                | Inadequate    |
| 21         | PASS                         | FAIL                       | PASS                       | PASS                          | FAIL                                | Inadequate    |
| 22         | PASS                         | PASS                       | PASS                       | PASS                          | FAIL                                | Inadequate    |
| 23         | PASS                         | PASS                       | PASS                       | PASS                          | FAIL                                | Inadequate    |
| 24         | PASS                         | PASS                       | FAIL                       | FAIL                          | FAIL                                | Inadequate    |
| 25         | PASS                         | PASS                       | FAIL                       | PASS                          | FAIL                                | Inadequate    |
| 26         | PASS                         | PASS                       | PASS                       | PASS                          | PASS                                | Adequate      |
| 27         | PASS                         | PASS                       | PASS                       | PASS                          | FAIL                                | Inadequate    |
| 28         | PASS                         | PASS                       | FAIL                       | PASS                          | PASS                                | Inadequate    |
| 29         | PASS                         | PASS                       | PASS                       | PASS                          | FAIL                                | Inadequate    |
| 30         | PASS                         | PASS                       | PASS                       | PASS                          | FAIL                                | Inadequate    |
| 31         | PASS                         | PASS                       | PASS                       | PASS                          | PASS                                | Adequate      |
| 32         | PASS                         | PASS                       | PASS                       | PASS                          | PASS                                | Adequate      |
| 33         | PASS                         | PASS                       | PASS                       | PASS                          | PASS                                | Adequate      |
| 34         | PASS                         | PASS                       | PASS                       | PASS                          | PASS                                | Adequate      |
| 35         | PASS                         | PASS                       | PASS                       | PASS                          | PASS                                | Adequate      |
| 36         | PASS                         | PASS                       | PASS                       | PASS                          | FAIL                                | Inadequate    |
| 37         | PASS                         | PASS                       | PASS                       | PASS                          | PASS                                | Adequate      |
| 38         | PASS                         | PASS                       | FAIL                       | PASS                          | FAIL                                | Inadequate    |
| 39         | PASS                         | PASS                       | PASS                       | PASS                          | PASS                                | Adequate      |
| 40         | PASS                         | PASS                       | PASS                       | FAIL                          | FAIL                                | Inadequate    |

|    |      |      |      |      |      |            |
|----|------|------|------|------|------|------------|
| 41 | PASS | PASS | PASS | PASS | FAIL | Inadequate |
| 42 | PASS | PASS | FAIL | PASS | FAIL | Inadequate |
| 43 | PASS | PASS | FAIL | PASS | FAIL | Inadequate |
| 44 | PASS | PASS | FAIL | PASS | PASS | Inadequate |
| 45 | PASS | PASS | PASS | PASS | PASS | Adequate   |
| 46 | PASS | PASS | FAIL | FAIL | FAIL | Inadequate |
| 47 | FAIL | PASS | FAIL | PASS | PASS | Inadequate |
| 48 | PASS | PASS | FAIL | PASS | FAIL | Inadequate |
| 49 | PASS | PASS | FAIL | PASS | FAIL | Inadequate |
| 50 | PASS | PASS | PASS | PASS | PASS | Adequate   |
| 51 | PASS | PASS | FAIL | PASS | FAIL | Inadequate |
| 52 | PASS | PASS | FAIL | PASS | FAIL | Inadequate |
| 53 | PASS | PASS | PASS | PASS | PASS | Adequate   |
| 54 | PASS | PASS | PASS | PASS | FAIL | Inadequate |
| 55 | PASS | PASS | FAIL | FAIL | FAIL | Inadequate |
| 56 | PASS | PASS | PASS | PASS | FAIL | Inadequate |
| 57 | PASS | PASS | PASS | PASS | PASS | Adequate   |
| 58 | FAIL | PASS | FAIL | FAIL | FAIL | Inadequate |
| 59 | PASS | PASS | FAIL | PASS | FAIL | Inadequate |
| 60 | FAIL | FAIL | FAIL | FAIL | FAIL | Inadequate |
| 61 | PASS | PASS | PASS | PASS | FAIL | Inadequate |
| 62 | PASS | PASS | PASS | PASS | FAIL | Inadequate |
| 63 | PASS | PASS | PASS | PASS | PASS | Adequate   |
| 64 | PASS | PASS | PASS | PASS | PASS | Adequate   |
| 65 | PASS | PASS | PASS | PASS | PASS | Adequate   |
| 66 | PASS | PASS | PASS | PASS | PASS | Adequate   |
| 67 | PASS | PASS | PASS | PASS | FAIL | Inadequate |
| 68 | PASS | PASS | PASS | PASS | PASS | Adequate   |
| 69 | FAIL | PASS | FAIL | PASS | FAIL | Inadequate |
| 70 | PASS | PASS | PASS | PASS | PASS | Adequate   |
| 71 | FAIL | FAIL | FAIL | PASS | FAIL | Inadequate |
| 72 | PASS | FAIL | PASS | PASS | PASS | Inadequate |
| 73 | PASS | PASS | PASS | PASS | PASS | Adequate   |
| 74 | PASS | PASS | PASS | PASS | PASS | Adequate   |
| 75 | PASS | PASS | PASS | PASS | PASS | Adequate   |
| 76 | PASS | PASS | PASS | PASS | PASS | Adequate   |
| 77 | PASS | PASS | PASS | PASS | PASS | Adequate   |
| 78 | PASS | PASS | PASS | PASS | PASS | Adequate   |
| 79 | PASS | PASS | PASS | PASS | FAIL | Inadequate |
| 80 | PASS | FAIL | FAIL | PASS | FAIL | Inadequate |
| 81 | PASS | PASS | FAIL | PASS | PASS | Inadequate |

|     |      |      |      |      |      |            |
|-----|------|------|------|------|------|------------|
| 82  | FAIL | FAIL | FAIL | PASS | FAIL | Inadequate |
| 83  | FAIL | PASS | FAIL | PASS | FAIL | Inadequate |
| 84  | PASS | PASS | FAIL | FAIL | FAIL | Inadequate |
| 85  | PASS | PASS | FAIL | PASS | PASS | Inadequate |
| 86  | FAIL | FAIL | FAIL | FAIL | FAIL | Inadequate |
| 87  | PASS | PASS | FAIL | PASS | FAIL | Inadequate |
| 88  | PASS | PASS | FAIL | PASS | PASS | Inadequate |
| 89  | PASS | PASS | PASS | PASS | PASS | Adequate   |
| 90  | PASS | PASS | FAIL | FAIL | FAIL | Inadequate |
| 91  | PASS | PASS | PASS | PASS | FAIL | Inadequate |
| 92  | PASS | PASS | PASS | PASS | FAIL | Inadequate |
| 93  | PASS | PASS | PASS | PASS | FAIL | Inadequate |
| 94  | PASS | PASS | PASS | PASS | PASS | Adequate   |
| 95  | FAIL | FAIL | FAIL | PASS | FAIL | Inadequate |
| 96  | PASS | PASS | PASS | FAIL | PASS | Inadequate |
| 97  | PASS | PASS | PASS | PASS | PASS | Adequate   |
| 98  | FAIL | PASS | PASS | PASS | PASS | Inadequate |
| 99  | PASS | PASS | PASS | PASS | PASS | Adequate   |
| 100 | PASS | PASS | FAIL | PASS | FAIL | Inadequate |
| 101 | PASS | PASS | FAIL | FAIL | FAIL | Inadequate |
| 102 | PASS | PASS | FAIL | PASS | PASS | Inadequate |
| 103 | PASS | PASS | PASS | PASS | PASS | Adequate   |
| 104 | PASS | PASS | FAIL | PASS | FAIL | Inadequate |
| 105 | PASS | PASS | PASS | PASS | PASS | Adequate   |
| 106 | FAIL | PASS | FAIL | PASS | PASS | Inadequate |
| 107 | PASS | FAIL | FAIL | PASS | FAIL | Inadequate |
| 108 | PASS | PASS | PASS | PASS | PASS | Adequate   |
| 109 | PASS | PASS | PASS | PASS | PASS | Adequate   |
| 110 | PASS | PASS | PASS | PASS | PASS | Adequate   |
| 111 | PASS | PASS | FAIL | PASS | FAIL | Inadequate |
| 112 | PASS | PASS | PASS | PASS | PASS | Adequate   |
| 113 | PASS | PASS | FAIL | PASS | PASS | Inadequate |
| 114 | FAIL | PASS | FAIL | PASS | PASS | Inadequate |
| 115 | PASS | PASS | PASS | PASS | PASS | Adequate   |
| 116 | PASS | PASS | PASS | FAIL | PASS | Inadequate |
| 117 | PASS | PASS | FAIL | PASS | FAIL | Inadequate |
| 118 | PASS | PASS | FAIL | PASS | PASS | Inadequate |
| 119 | PASS | PASS | PASS | FAIL | FAIL | Inadequate |
| 120 | PASS | PASS | PASS | FAIL | FAIL | Inadequate |
| 121 | PASS | PASS | PASS | FAIL | FAIL | Inadequate |
| 122 | PASS | PASS | PASS | FAIL | FAIL | Inadequate |

|     |      |      |      |      |      |            |
|-----|------|------|------|------|------|------------|
| 123 | PASS | PASS | PASS | FAIL | FAIL | Inadequate |
| 124 | PASS | PASS | PASS | FAIL | FAIL | Inadequate |
| 125 | PASS | PASS | PASS | FAIL | FAIL | Inadequate |
| 126 | PASS | PASS | PASS | FAIL | FAIL | Inadequate |
| 127 | PASS | PASS | PASS | FAIL | FAIL | Inadequate |
| 128 | PASS | PASS | PASS | PASS | PASS | Adequate   |
| 129 | PASS | PASS | PASS | PASS | PASS | Adequate   |
| 130 | PASS | PASS | PASS | PASS | PASS | Adequate   |
| 131 | PASS | PASS | PASS | PASS | PASS | Adequate   |
| 132 | PASS | PASS | PASS | PASS | PASS | Adequate   |
| 133 | PASS | PASS | PASS | PASS | PASS | Adequate   |
| 134 | PASS | PASS | PASS | PASS | PASS | Adequate   |
| 135 | PASS | PASS | PASS | PASS | PASS | Adequate   |
| 136 | PASS | PASS | PASS | PASS | PASS | Adequate   |
| 137 | PASS | PASS | PASS | PASS | PASS | Adequate   |
| 138 | PASS | PASS | PASS | PASS | PASS | Adequate   |
| 139 | PASS | PASS | PASS | PASS | PASS | Adequate   |
| 140 | PASS | PASS | PASS | PASS | PASS | Adequate   |
| 141 | PASS | PASS | PASS | PASS | PASS | Adequate   |
| 142 | PASS | PASS | PASS | PASS | PASS | Adequate   |
| 143 | PASS | PASS | PASS | PASS | PASS | Adequate   |
| 144 | PASS | PASS | PASS | PASS | PASS | Adequate   |
| 145 | PASS | PASS | PASS | PASS | PASS | Adequate   |
| 146 | PASS | PASS | PASS | PASS | PASS | Adequate   |
| 147 | PASS | PASS | PASS | PASS | PASS | Adequate   |
| 148 | PASS | PASS | PASS | PASS | FAIL | Inadequate |
| 149 | FAIL | PASS | PASS | PASS | FAIL | Inadequate |
| 150 | FAIL | PASS | PASS | PASS | FAIL | Inadequate |
| 151 | FAIL | PASS | PASS | PASS | FAIL | Inadequate |
| 152 | PASS | PASS | PASS | FAIL | PASS | Inadequate |
| 153 | PASS | PASS | FAIL | PASS | FAIL | Inadequate |
| 154 | PASS | PASS | FAIL | PASS | FAIL | Inadequate |
| 155 | PASS | PASS | FAIL | PASS | PASS | Inadequate |
| 156 | PASS | PASS | PASS | PASS | PASS | Adequate   |
| 157 | FAIL | FAIL | FAIL | FAIL | PASS | Inadequate |
| 158 | PASS | PASS | PASS | PASS | PASS | Adequate   |
| 159 | PASS | PASS | PASS | FAIL | PASS | Inadequate |
| 160 | FAIL | PASS | FAIL | PASS | FAIL | Inadequate |
| 161 | FAIL | PASS | FAIL | FAIL | FAIL | Inadequate |
| 162 | PASS | PASS | PASS | PASS | PASS | Adequate   |
| 163 | FAIL | PASS | PASS | FAIL | FAIL | Inadequate |

|     |      |      |      |      |      |            |
|-----|------|------|------|------|------|------------|
| 164 | PASS | PASS | PASS | PASS | PASS | Adequate   |
| 165 | PASS | PASS | PASS | PASS | PASS | Adequate   |
| 166 | PASS | PASS | FAIL | PASS | PASS | Inadequate |
| 167 | PASS | PASS | FAIL | PASS | PASS | Inadequate |
| 168 | PASS | PASS | FAIL | FAIL | FAIL | Inadequate |
| 169 | PASS | PASS | PASS | PASS | PASS | Adequate   |
| 170 | PASS | PASS | PASS | PASS | PASS | Adequate   |
| 171 | FAIL | PASS | FAIL | FAIL | PASS | Inadequate |
| 172 | FAIL | PASS | FAIL | PASS | FAIL | Inadequate |
| 173 | PASS | PASS | PASS | PASS | PASS | Adequate   |
| 174 | PASS | PASS | PASS | FAIL | FAIL | Inadequate |
| 175 | PASS | PASS | PASS | FAIL | PASS | Inadequate |
| 176 | PASS | PASS | PASS | FAIL | FAIL | Inadequate |
| 177 | PASS | PASS | FAIL | FAIL | FAIL | Inadequate |
| 178 | PASS | PASS | PASS | PASS | PASS | Adequate   |
| 179 | FAIL | PASS | FAIL | FAIL | PASS | Inadequate |
| 180 | PASS | PASS | PASS | FAIL | PASS | Inadequate |
| 181 | PASS | PASS | FAIL | FAIL | PASS | Inadequate |
| 182 | PASS | PASS | PASS | PASS | PASS | Adequate   |
| 183 | PASS | PASS | PASS | PASS | PASS | Adequate   |
| 184 | PASS | PASS | FAIL | PASS | PASS | Inadequate |
| 185 | PASS | PASS | PASS | PASS | PASS | Adequate   |
| 186 | PASS | PASS | FAIL | PASS | PASS | Inadequate |
| 187 | PASS | PASS | PASS | PASS | PASS | Adequate   |
| 188 | FAIL | FAIL | FAIL | PASS | FAIL | Inadequate |
| 189 | FAIL | FAIL | FAIL | PASS | PASS | Inadequate |
| 190 | PASS | PASS | PASS | PASS | FAIL | Inadequate |
| 191 | PASS | PASS | PASS | PASS | PASS | Adequate   |
| 192 | PASS | PASS | PASS | PASS | PASS | Adequate   |
| 193 | FAIL | FAIL | FAIL | PASS | PASS | Inadequate |
| 194 | PASS | PASS | PASS | PASS | PASS | Adequate   |
| 195 | PASS | PASS | PASS | PASS | FAIL | Inadequate |
| 196 | PASS | PASS | PASS | PASS | PASS | Adequate   |
| 197 | PASS | PASS | PASS | PASS | PASS | Adequate   |
| 198 | FAIL | FAIL | FAIL | PASS | FAIL | Inadequate |
| 199 | PASS | PASS | PASS | PASS | PASS | Adequate   |
| 200 | PASS | PASS | PASS | PASS | PASS | Adequate   |
| 201 | PASS | PASS | FAIL | PASS | PASS | Inadequate |
| 202 | FAIL | FAIL | FAIL | PASS | PASS | Inadequate |
| 203 | PASS | PASS | PASS | PASS | PASS | Adequate   |
| 204 | FAIL | FAIL | FAIL | PASS | PASS | Inadequate |

|     |      |      |      |      |      |            |
|-----|------|------|------|------|------|------------|
| 205 | PASS | PASS | PASS | PASS | PASS | Adequate   |
| 206 | FAIL | FAIL | FAIL | PASS | FAIL | Inadequate |
| 207 | PASS | PASS | PASS | PASS | PASS | Adequate   |
| 208 | PASS | FAIL | PASS | PASS | FAIL | Inadequate |
| 209 | PASS | FAIL | PASS | PASS | PASS | Inadequate |
| 210 | FAIL | FAIL | FAIL | PASS | PASS | Inadequate |
| 211 | FAIL | FAIL | PASS | PASS | FAIL | Inadequate |
| 212 | PASS | PASS | FAIL | PASS | FAIL | Inadequate |
| 213 | FAIL | PASS | PASS | FAIL | FAIL | Inadequate |
| 214 | PASS | PASS | PASS | FAIL | PASS | Inadequate |
| 215 | FAIL | PASS | PASS | PASS | FAIL | Inadequate |
| 216 | PASS | PASS | FAIL | FAIL | FAIL | Inadequate |
| 217 | FAIL | PASS | PASS | FAIL | PASS | Inadequate |
| 218 | PASS | PASS | PASS | PASS | FAIL | Inadequate |
| 219 | PASS | PASS | PASS | PASS | PASS | Adequate   |
| 220 | PASS | PASS | PASS | FAIL | PASS | Inadequate |
| 221 | PASS | PASS | PASS | PASS | PASS | Adequate   |
| 222 | FAIL | FAIL | FAIL | PASS | FAIL | Inadequate |
| 223 | PASS | PASS | FAIL | PASS | FAIL | Inadequate |
| 224 | PASS | FAIL | FAIL | PASS | PASS | Inadequate |
| 225 | PASS | PASS | PASS | PASS | FAIL | Inadequate |
| 226 | FAIL | PASS | PASS | PASS | FAIL | Inadequate |
| 227 | PASS | PASS | PASS | PASS | FAIL | Inadequate |
| 228 | PASS | PASS | PASS | PASS | FAIL | Inadequate |
| 229 | FAIL | FAIL | FAIL | PASS | FAIL | Inadequate |
| 230 | FAIL | FAIL | FAIL | PASS | FAIL | Inadequate |
| 231 | FAIL | FAIL | PASS | PASS | FAIL | Inadequate |
| 232 | PASS | FAIL | PASS | PASS | PASS | Inadequate |
| 233 | PASS | PASS | PASS | FAIL | PASS | Inadequate |
| 234 | FAIL | FAIL | FAIL | PASS | FAIL | Inadequate |
| 235 | FAIL | FAIL | PASS | PASS | PASS | Inadequate |
| 236 | PASS | PASS | PASS | FAIL | PASS | Inadequate |
| 237 | PASS | PASS | PASS | FAIL | PASS | Inadequate |
| 238 | PASS | PASS | FAIL | PASS | PASS | Inadequate |
| 239 | PASS | PASS | PASS | PASS | FAIL | Inadequate |
| 240 | PASS | PASS | PASS | FAIL | PASS | Inadequate |
| 241 | PASS | PASS | PASS | PASS | FAIL | Inadequate |
| 242 | PASS | PASS | PASS | PASS | PASS | Adequate   |
| 243 | PASS | PASS | PASS | FAIL | PASS | Inadequate |
| 244 | PASS | PASS | PASS | PASS | PASS | Adequate   |
| 245 | PASS | PASS | PASS | FAIL | FAIL | Inadequate |

|     |      |      |      |      |      |            |
|-----|------|------|------|------|------|------------|
| 246 | PASS | PASS | FAIL | PASS | PASS | Inadequate |
| 247 | PASS | PASS | PASS | PASS | PASS | Adequate   |
| 248 | PASS | PASS | PASS | FAIL | PASS | Inadequate |
| 249 | PASS | PASS | PASS | FAIL | PASS | Inadequate |
| 250 | PASS | PASS | PASS | PASS | PASS | Adequate   |
| 251 | PASS | PASS | PASS | PASS | PASS | Adequate   |
| 252 | PASS | FAIL | PASS | PASS | PASS | Inadequate |
| 253 | PASS | PASS | PASS | PASS | PASS | Adequate   |
| 254 | PASS | PASS | FAIL | PASS | FAIL | Inadequate |
| 255 | PASS | PASS | PASS | PASS | PASS | Adequate   |
| 256 | PASS | PASS | PASS | FAIL | PASS | Inadequate |
| 257 | PASS | PASS | PASS | FAIL | PASS | Inadequate |
| 258 | PASS | PASS | PASS | PASS | PASS | Adequate   |
| 259 | PASS | PASS | PASS | PASS | PASS | Adequate   |
| 260 | PASS | PASS | PASS | PASS | PASS | Adequate   |
| 261 | PASS | PASS | PASS | PASS | PASS | Adequate   |
| 262 | PASS | PASS | PASS | PASS | PASS | Adequate   |
| 263 | PASS | PASS | PASS | PASS | PASS | Adequate   |
| 264 | PASS | PASS | PASS | PASS | FAIL | Inadequate |
| 265 | PASS | PASS | PASS | PASS | PASS | Adequate   |
| 266 | PASS | PASS | PASS | PASS | PASS | Adequate   |
| 267 | PASS | PASS | PASS | PASS | FAIL | Inadequate |
| 268 | FAIL | PASS | PASS | PASS | PASS | Inadequate |
| 269 | PASS | PASS | PASS | PASS | PASS | Adequate   |
| 270 | PASS | PASS | PASS | PASS | FAIL | Inadequate |
| 271 | PASS | PASS | FAIL | PASS | PASS | Inadequate |
| 272 | PASS | PASS | PASS | PASS | PASS | Adequate   |
| 273 | PASS | PASS | PASS | FAIL | PASS | Inadequate |
| 274 | PASS | PASS | PASS | PASS | PASS | Adequate   |
| 275 | PASS | PASS | PASS | PASS | PASS | Adequate   |
| 276 | PASS | PASS | PASS | PASS | PASS | Adequate   |
| 277 | PASS | PASS | PASS | PASS | PASS | Adequate   |
| 278 | FAIL | PASS | PASS | FAIL | PASS | Inadequate |
| 279 | PASS | PASS | PASS | PASS | PASS | Adequate   |
| 280 | PASS | PASS | FAIL | PASS | PASS | Inadequate |
| 281 | FAIL | PASS | PASS | PASS | FAIL | Inadequate |
| 282 | FAIL | PASS | PASS | FAIL | FAIL | Inadequate |
| 283 | PASS | PASS | FAIL | PASS | PASS | Inadequate |
| 284 | PASS | PASS | PASS | FAIL | FAIL | Inadequate |
| 285 | PASS | PASS | PASS | PASS | PASS | Adequate   |
| 286 | PASS | PASS | PASS | PASS | PASS | Adequate   |

|     |      |      |      |      |      |            |
|-----|------|------|------|------|------|------------|
| 287 | PASS | PASS | FAIL | PASS | PASS | Inadequate |
| 288 | PASS | PASS | PASS | FAIL | FAIL | Inadequate |
| 289 | FAIL | PASS | FAIL | PASS | FAIL | Inadequate |
| 290 | PASS | PASS | PASS | PASS | PASS | Adequate   |
| 291 | FAIL | PASS | FAIL | PASS | FAIL | Inadequate |
| 292 | FAIL | PASS | FAIL | FAIL | PASS | Inadequate |
| 293 | PASS | PASS | FAIL | PASS | PASS | Inadequate |
| 294 | PASS | PASS | PASS | FAIL | PASS | Inadequate |
| 295 | PASS | PASS | FAIL | FAIL | FAIL | Inadequate |
| 296 | PASS | PASS | FAIL | PASS | PASS | Inadequate |
| 297 | PASS | PASS | PASS | FAIL | PASS | Inadequate |
| 298 | PASS | PASS | FAIL | FAIL | PASS | Inadequate |
| 299 | PASS | PASS | PASS | PASS | PASS | Adequate   |
| 300 | PASS | PASS | FAIL | PASS | PASS | Inadequate |
| 301 | FAIL | PASS | FAIL | FAIL | PASS | Inadequate |
| 302 | PASS | PASS | FAIL | PASS | PASS | Inadequate |
| 303 | PASS | PASS | PASS | PASS | PASS | Adequate   |
| 304 | PASS | PASS | FAIL | PASS | PASS | Inadequate |
| 305 | FAIL | PASS | PASS | PASS | PASS | Inadequate |
| 306 | PASS | PASS | PASS | PASS | PASS | Adequate   |
| 307 | FAIL | PASS | PASS | PASS | PASS | Inadequate |
| 308 | PASS | PASS | PASS | PASS | PASS | Adequate   |
| 309 | PASS | PASS | PASS | PASS | PASS | Adequate   |
| 310 | PASS | PASS | PASS | PASS | PASS | Adequate   |
| 311 | PASS | PASS | PASS | PASS | PASS | Adequate   |
| 312 | PASS | PASS | PASS | PASS | PASS | Adequate   |
| 313 | PASS | PASS | PASS | PASS | PASS | Adequate   |
| 314 | PASS | PASS | PASS | PASS | PASS | Adequate   |
| 315 | PASS | PASS | PASS | PASS | PASS | Adequate   |
| 316 | PASS | PASS | PASS | PASS | PASS | Adequate   |
| 317 | PASS | PASS | PASS | PASS | PASS | Adequate   |
| 318 | PASS | PASS | PASS | PASS | FAIL | Inadequate |
| 319 | PASS | PASS | PASS | PASS | PASS | Adequate   |
| 320 | PASS | PASS | PASS | PASS | FAIL | Inadequate |
| 321 | PASS | PASS | PASS | PASS | PASS | Adequate   |
| 322 | PASS | PASS | FAIL | PASS | FAIL | Inadequate |
| 323 | PASS | PASS | FAIL | FAIL | PASS | Inadequate |
| 324 | PASS | PASS | FAIL | FAIL | PASS | Inadequate |
| 325 | FAIL | FAIL | FAIL | FAIL | PASS | Inadequate |
| 326 | PASS | PASS | PASS | PASS | PASS | Adequate   |
| 327 | PASS | PASS | PASS | PASS | PASS | Adequate   |



|     |      |      |      |      |      |            |
|-----|------|------|------|------|------|------------|
| 328 | PASS | PASS | PASS | PASS | PASS | Adequate   |
| 329 | FAIL | PASS | FAIL | FAIL | FAIL | Inadequate |
| 330 | PASS | PASS | PASS | PASS | PASS | Adequate   |
| 331 | PASS | PASS | PASS | PASS | PASS | Adequate   |
| 332 | PASS | PASS | PASS | PASS | PASS | Adequate   |
| 333 | PASS | PASS | PASS | PASS | PASS | Adequate   |
| 334 | PASS | PASS | PASS | PASS | PASS | Adequate   |
| 335 | PASS | PASS | PASS | PASS | PASS | Adequate   |
| 336 | PASS | PASS | PASS | FAIL | PASS | Inadequate |
| 337 | PASS | PASS | PASS | PASS | PASS | Adequate   |
| 338 | PASS | PASS | PASS | PASS | FAIL | Inadequate |
| 339 | PASS | PASS | PASS | PASS | PASS | Adequate   |
| 340 | PASS | PASS | FAIL | PASS | FAIL | Inadequate |
| 341 | PASS | PASS | FAIL | PASS | PASS | Inadequate |
| 342 | PASS | PASS | PASS | PASS | FAIL | Inadequate |
| 343 | PASS | PASS | PASS | FAIL | PASS | Inadequate |
| 344 | FAIL | FAIL | FAIL | PASS | FAIL | Inadequate |
| 345 | FAIL | PASS | FAIL | FAIL | PASS | Inadequate |
| 346 | PASS | PASS | PASS | FAIL | PASS | Inadequate |
| 347 | PASS | PASS | PASS | PASS | PASS | Adequate   |
| 348 | PASS | PASS | PASS | PASS | PASS | Adequate   |
| 349 | FAIL | FAIL | FAIL | PASS | PASS | Inadequate |
| 350 | PASS | PASS | PASS | FAIL | PASS | Inadequate |
| 351 | FAIL | PASS | FAIL | FAIL | FAIL | Inadequate |
| 352 | PASS | PASS | PASS | PASS | PASS | Adequate   |
| 353 | FAIL | PASS | FAIL | PASS | PASS | Inadequate |
| 354 | PASS | PASS | FAIL | FAIL | FAIL | Inadequate |
| 355 | PASS | PASS | PASS | PASS | PASS | Adequate   |
| 356 | PASS | PASS | PASS | PASS | PASS | Adequate   |
| 357 | PASS | PASS | PASS | PASS | FAIL | Inadequate |
| 358 | PASS | PASS | PASS | PASS | FAIL | Inadequate |
| 359 | PASS | PASS | PASS | PASS | PASS | Adequate   |
| 360 | PASS | PASS | PASS | PASS | PASS | Adequate   |
| 361 | PASS | PASS | FAIL | PASS | FAIL | Inadequate |
| 362 | FAIL | PASS | FAIL | FAIL | FAIL | Inadequate |
| 363 | PASS | PASS | PASS | PASS | PASS | Adequate   |
| 364 | PASS | PASS | PASS | FAIL | PASS | Inadequate |
| 365 | PASS | PASS | FAIL | PASS | PASS | Inadequate |
| 366 | PASS | PASS | PASS | PASS | FAIL | Inadequate |
| 367 | PASS | PASS | PASS | PASS | PASS | Adequate   |
| 368 | PASS | PASS | PASS | PASS | FAIL | Inadequate |

|     |      |      |      |      |      |            |
|-----|------|------|------|------|------|------------|
| 369 | PASS | PASS | PASS | PASS | PASS | Adequate   |
| 370 | FAIL | PASS | FAIL | PASS | FAIL | Inadequate |
| 371 | PASS | FAIL | FAIL | PASS | FAIL | Inadequate |
| 372 | PASS | PASS | FAIL | PASS | PASS | Inadequate |
| 373 | PASS | PASS | PASS | PASS | PASS | Adequate   |
| 374 | PASS | PASS | PASS | PASS | FAIL | Inadequate |
| 375 | PASS | PASS | PASS | PASS | PASS | Adequate   |
| 376 | PASS | PASS | PASS | PASS | PASS | Adequate   |
| 377 | PASS | PASS | PASS | PASS | FAIL | Inadequate |
| 378 | PASS | FAIL | FAIL | PASS | PASS | Inadequate |
| 379 | PASS | PASS | PASS | PASS | PASS | Adequate   |
| 380 | PASS | PASS | FAIL | PASS | PASS | Inadequate |
| 381 | PASS | FAIL | PASS | PASS | FAIL | Inadequate |
| 382 | PASS | PASS | PASS | PASS | FAIL | Inadequate |
| 383 | PASS | PASS | PASS | PASS | FAIL | Inadequate |
| 384 | PASS | PASS | FAIL | PASS | PASS | Inadequate |
| 385 | PASS | PASS | PASS | PASS | PASS | Adequate   |
| 386 | PASS | PASS | PASS | PASS | PASS | Adequate   |
| 387 | FAIL | PASS | FAIL | FAIL | FAIL | Inadequate |
| 388 | FAIL | FAIL | FAIL | PASS | FAIL | Inadequate |
| 389 | PASS | PASS | PASS | PASS | FAIL | Inadequate |
| 390 | FAIL | PASS | FAIL | PASS | PASS | Inadequate |
| 391 | PASS | PASS | PASS | PASS | PASS | Adequate   |
| 392 | FAIL | PASS | FAIL | PASS | FAIL | Inadequate |
| 393 | PASS | PASS | PASS | PASS | PASS | Adequate   |
| 394 | FAIL | PASS | PASS | PASS | FAIL | Inadequate |
| 395 | PASS | PASS | PASS | PASS | PASS | Adequate   |
| 396 | PASS | PASS | PASS | PASS | FAIL | Inadequate |
| 397 | PASS | PASS | PASS | PASS | PASS | Adequate   |
| 398 | FAIL | PASS | FAIL | PASS | PASS | Inadequate |
| 399 | PASS | PASS | PASS | PASS | PASS | Adequate   |
| 400 | PASS | PASS | PASS | PASS | PASS | Adequate   |
| 401 | FAIL | PASS | PASS | PASS | PASS | Inadequate |
| 402 | FAIL | FAIL | PASS | PASS | PASS | Inadequate |
| 403 | PASS | PASS | PASS | PASS | PASS | Adequate   |
| 404 | FAIL | PASS | FAIL | PASS | PASS | Inadequate |
| 405 | FAIL | PASS | FAIL | PASS | FAIL | Inadequate |
| 406 | FAIL | PASS | FAIL | PASS | PASS | Inadequate |
| 407 | PASS | PASS | PASS | PASS | PASS | Adequate   |
| 408 | PASS | PASS | PASS | PASS | PASS | Adequate   |
| 409 | PASS | FAIL | FAIL | PASS | PASS | Inadequate |

|     |      |      |      |      |      |            |
|-----|------|------|------|------|------|------------|
| 410 | PASS | PASS | PASS | PASS | PASS | Adequate   |
| 411 | FAIL | PASS | FAIL | PASS | PASS | Inadequate |
| 412 | PASS | PASS | PASS | PASS | PASS | Adequate   |
| 413 | PASS | PASS | FAIL | PASS | PASS | Inadequate |
| 414 | PASS | PASS | PASS | PASS | PASS | Adequate   |
| 415 | FAIL | PASS | PASS | PASS | FAIL | Inadequate |
| 416 | PASS | PASS | PASS | PASS | FAIL | Inadequate |
| 417 | PASS | PASS | PASS | PASS | PASS | Adequate   |
| 418 | PASS | PASS | PASS | PASS | PASS | Adequate   |
| 419 | PASS | PASS | PASS | PASS | FAIL | Inadequate |
| 420 | PASS | PASS | PASS | PASS | FAIL | Inadequate |
| 421 | PASS | PASS | FAIL | PASS | PASS | Inadequate |
| 422 | PASS | PASS | PASS | PASS | PASS | Adequate   |
| 423 | PASS | PASS | PASS | PASS | PASS | Adequate   |
| 424 | PASS | FAIL | FAIL | FAIL | PASS | Inadequate |
| 425 | PASS | PASS | FAIL | PASS | PASS | Inadequate |
| 426 | PASS | PASS | FAIL | PASS | PASS | Inadequate |
| 427 | PASS | PASS | PASS | PASS | PASS | Adequate   |
| 428 | PASS | PASS | PASS | PASS | FAIL | Inadequate |
| 429 | PASS | PASS | PASS | PASS | FAIL | Inadequate |
| 430 | FAIL | FAIL | FAIL | PASS | FAIL | Inadequate |
| 431 | FAIL | PASS | FAIL | FAIL | PASS | Inadequate |
| 432 | PASS | PASS | PASS | PASS | PASS | Adequate   |
| 433 | FAIL | PASS | FAIL | PASS | FAIL | Inadequate |
| 434 | PASS | PASS | PASS | PASS | PASS | Adequate   |
| 435 | PASS | PASS | PASS | PASS | PASS | Adequate   |
| 436 | PASS | PASS | PASS | PASS | PASS | Adequate   |
| 437 | PASS | PASS | PASS | PASS | FAIL | Inadequate |
| 438 | PASS | PASS | PASS | PASS | FAIL | Inadequate |
| 439 | PASS | PASS | PASS | PASS | PASS | Adequate   |
| 440 | PASS | PASS | FAIL | FAIL | FAIL | Inadequate |
| 441 | PASS | PASS | PASS | PASS | PASS | Adequate   |
| 442 | FAIL | FAIL | FAIL | PASS | PASS | Inadequate |
| 443 | PASS | PASS | PASS | FAIL | PASS | Inadequate |
| 444 | PASS | PASS | PASS | PASS | PASS | Adequate   |
| 445 | PASS | PASS | PASS | PASS | PASS | Adequate   |
| 446 | PASS | PASS | PASS | PASS | PASS | Adequate   |
| 447 | PASS | PASS | PASS | FAIL | PASS | Inadequate |
| 448 | PASS | PASS | FAIL | PASS | PASS | Inadequate |
| 449 | PASS | PASS | FAIL | PASS | PASS | Inadequate |
| 450 | PASS | PASS | PASS | PASS | PASS | Adequate   |

|     |      |      |      |      |      |            |
|-----|------|------|------|------|------|------------|
| 451 | PASS | PASS | PASS | FAIL | FAIL | Inadequate |
| 452 | PASS | PASS | PASS | PASS | PASS | Adequate   |
| 453 | FAIL | PASS | FAIL | PASS | FAIL | Inadequate |
| 454 | PASS | PASS | FAIL | FAIL | PASS | Inadequate |
| 455 | FAIL | FAIL | FAIL | PASS | PASS | Inadequate |
| 456 | PASS | PASS | PASS | PASS | FAIL | Inadequate |
| 457 | PASS | PASS | PASS | PASS | PASS | Adequate   |
| 458 | PASS | PASS | PASS | PASS | PASS | Adequate   |
| 459 | PASS | PASS | PASS | PASS | FAIL | Inadequate |
| 460 | PASS | PASS | PASS | PASS | FAIL | Inadequate |
| 461 | PASS | PASS | PASS | FAIL | PASS | Inadequate |
| 462 | PASS | PASS | PASS | PASS | PASS | Adequate   |
| 463 | FAIL | PASS | PASS | FAIL | PASS | Inadequate |
| 464 | PASS | PASS | PASS | PASS | PASS | Adequate   |
| 465 | PASS | PASS | PASS | PASS | PASS | Adequate   |
| 466 | PASS | PASS | PASS | PASS | PASS | Adequate   |
| 467 | PASS | PASS | PASS | PASS | PASS | Adequate   |
| 468 | PASS | PASS | PASS | PASS | PASS | Adequate   |
| 469 | PASS | PASS | PASS | FAIL | PASS | Inadequate |
| 470 | PASS | PASS | PASS | PASS | PASS | Adequate   |
| 471 | PASS | PASS | FAIL | PASS | PASS | Inadequate |
| 472 | PASS | PASS | FAIL | FAIL | PASS | Inadequate |
| 473 | PASS | PASS | FAIL | FAIL | PASS | Inadequate |
| 474 | PASS | PASS | FAIL | FAIL | PASS | Inadequate |
| 475 | PASS | PASS | FAIL | PASS | PASS | Inadequate |
| 476 | PASS | PASS | FAIL | FAIL | PASS | Inadequate |
| 477 | PASS | PASS | FAIL | FAIL | PASS | Inadequate |
| 478 | PASS | PASS | FAIL | PASS | PASS | Inadequate |
| 479 | PASS | PASS | FAIL | FAIL | PASS | Inadequate |
| 480 | PASS | PASS | FAIL | PASS | PASS | Inadequate |
| 481 | PASS | PASS | FAIL | FAIL | PASS | Inadequate |
| 482 | PASS | PASS | FAIL | PASS | PASS | Inadequate |
| 483 | PASS | PASS | FAIL | FAIL | PASS | Inadequate |
| 484 | PASS | PASS | FAIL | FAIL | PASS | Inadequate |
| 485 | PASS | PASS | FAIL | PASS | PASS | Inadequate |
| 486 | PASS | PASS | FAIL | PASS | PASS | Inadequate |
| 487 | PASS | PASS | PASS | PASS | PASS | Adequate   |
| 488 | FAIL | PASS | PASS | FAIL | PASS | Inadequate |
| 489 | PASS | PASS | PASS | PASS | PASS | Adequate   |
| 490 | PASS | PASS | PASS | PASS | PASS | Adequate   |
| 491 | PASS | PASS | PASS | PASS | PASS | Adequate   |

|     |      |      |      |      |      |            |
|-----|------|------|------|------|------|------------|
| 492 | PASS | PASS | PASS | PASS | PASS | Adequate   |
| 493 | PASS | PASS | PASS | PASS | PASS | Adequate   |
| 494 | PASS | PASS | PASS | FAIL | PASS | Inadequate |
| 495 | PASS | PASS | PASS | PASS | FAIL | Inadequate |
| 496 | PASS | PASS | FAIL | PASS | FAIL | Inadequate |
| 497 | PASS | PASS | FAIL | PASS | FAIL | Inadequate |
| 498 | PASS | PASS | FAIL | PASS | PASS | Inadequate |
| 499 | PASS | PASS | PASS | PASS | PASS | Adequate   |
| 500 | PASS | PASS | FAIL | FAIL | FAIL | Inadequate |
| 501 | FAIL | PASS | FAIL | PASS | PASS | Inadequate |
| 502 | PASS | PASS | FAIL | PASS | FAIL | Inadequate |
| 503 | PASS | PASS | FAIL | PASS | FAIL | Inadequate |
| 504 | PASS | PASS | PASS | PASS | PASS | Adequate   |
| 505 | PASS | PASS | FAIL | PASS | FAIL | Inadequate |
| 506 | PASS | PASS | FAIL | PASS | FAIL | Inadequate |
| 507 | PASS | PASS | PASS | PASS | PASS | Adequate   |
| 508 | PASS | PASS | PASS | PASS | FAIL | Inadequate |
| 509 | PASS | PASS | FAIL | FAIL | FAIL | Inadequate |
| 510 | PASS | PASS | PASS | PASS | FAIL | Inadequate |
| 511 | PASS | PASS | PASS | PASS | PASS | Adequate   |
| 512 | FAIL | PASS | FAIL | FAIL | FAIL | Inadequate |
| 513 | PASS | PASS | FAIL | PASS | FAIL | Inadequate |
| 514 | PASS | PASS | PASS | FAIL | PASS | Inadequate |
| 515 | FAIL | PASS | PASS | PASS | FAIL | Inadequate |
| 516 | PASS | PASS | FAIL | FAIL | FAIL | Inadequate |
| 517 | FAIL | PASS | PASS | FAIL | PASS | Inadequate |
| 518 | PASS | PASS | PASS | PASS | FAIL | Inadequate |
| 519 | PASS | PASS | PASS | PASS | PASS | Adequate   |
| 520 | PASS | PASS | PASS | FAIL | PASS | Inadequate |
| 521 | PASS | PASS | PASS | PASS | PASS | Adequate   |
| 522 | PASS | PASS | FAIL | PASS | PASS | Inadequate |
| 523 | FAIL | FAIL | FAIL | PASS | FAIL | Inadequate |
| 524 | FAIL | PASS | FAIL | PASS | FAIL | Inadequate |
| 525 | PASS | PASS | FAIL | FAIL | FAIL | Inadequate |
| 526 | PASS | PASS | FAIL | PASS | PASS | Inadequate |
| 527 | FAIL | FAIL | FAIL | FAIL | FAIL | Inadequate |
| 528 | PASS | PASS | FAIL | PASS | FAIL | Inadequate |
| 529 | PASS | PASS | FAIL | PASS | PASS | Inadequate |
| 530 | PASS | PASS | PASS | PASS | PASS | Adequate   |
| 531 | PASS | PASS | FAIL | FAIL | FAIL | Inadequate |
| 532 | PASS | PASS | PASS | PASS | FAIL | Inadequate |

|     |      |      |      |      |      |            |
|-----|------|------|------|------|------|------------|
| 533 | PASS | PASS | PASS | PASS | FAIL | Inadequate |
| 534 | PASS | PASS | PASS | PASS | PASS | Adequate   |
| 535 | PASS | PASS | FAIL | FAIL | FAIL | Inadequate |
| 536 | FAIL | PASS | PASS | PASS | FAIL | Inadequate |
| 537 | FAIL | PASS | PASS | PASS | FAIL | Inadequate |
| 538 | FAIL | PASS | PASS | PASS | FAIL | Inadequate |
| 539 | FAIL | PASS | PASS | PASS | FAIL | Inadequate |
| 540 | PASS | PASS | PASS | FAIL | PASS | Inadequate |
| 541 | PASS | PASS | PASS | PASS | PASS | Adequate   |
| 542 | FAIL | PASS | PASS | FAIL | PASS | Inadequate |
| 543 | PASS | PASS | PASS | PASS | PASS | Adequate   |
| 544 | PASS | PASS | PASS | PASS | PASS | Adequate   |
| 545 | PASS | PASS | PASS | PASS | PASS | Adequate   |
| 546 | PASS | PASS | FAIL | FAIL | PASS | Inadequate |
| 547 | PASS | PASS | FAIL | FAIL | PASS | Inadequate |
| 548 | PASS | PASS | FAIL | PASS | PASS | Inadequate |
| 549 | PASS | PASS | FAIL | PASS | PASS | Inadequate |
| 550 | FAIL | FAIL | FAIL | PASS | FAIL | Inadequate |
| 551 | PASS | PASS | FAIL | PASS | FAIL | Inadequate |
| 552 | PASS | PASS | PASS | PASS | FAIL | Inadequate |
| 553 | PASS | PASS | PASS | PASS | FAIL | Inadequate |
| 554 | PASS | PASS | FAIL | PASS | FAIL | Inadequate |
| 555 | PASS | PASS | PASS | PASS | FAIL | Inadequate |
| 556 | PASS | PASS | PASS | PASS | FAIL | Inadequate |
| 557 | FAIL | PASS | PASS | PASS | PASS | Inadequate |
| 558 | PASS | PASS | PASS | PASS | PASS | Adequate   |
| 559 | PASS | PASS | PASS | PASS | PASS | Adequate   |
| 560 | PASS | FAIL | FAIL | PASS | PASS | Inadequate |
| 561 | PASS | PASS | PASS | PASS | FAIL | Inadequate |
| 562 | PASS | PASS | PASS | PASS | FAIL | Inadequate |
| 563 | PASS | PASS | PASS | PASS | FAIL | Inadequate |
| 564 | PASS | PASS | PASS | PASS | FAIL | Inadequate |
| 565 | PASS | PASS | FAIL | FAIL | FAIL | Inadequate |
| 566 | PASS | PASS | PASS | PASS | PASS | Adequate   |
| 567 | PASS | PASS | FAIL | PASS | FAIL | Inadequate |
| 568 | PASS | PASS | FAIL | PASS | PASS | Inadequate |
| 569 | FAIL | PASS | FAIL | PASS | FAIL | Inadequate |
| 570 | PASS | FAIL | PASS | PASS | FAIL | Inadequate |
| 571 | PASS | PASS | PASS | PASS | FAIL | Inadequate |
| 572 | PASS | PASS | PASS | PASS | FAIL | Inadequate |
| 573 | PASS | PASS | PASS | FAIL | FAIL | Inadequate |

|     |      |      |      |      |      |            |
|-----|------|------|------|------|------|------------|
| 574 | PASS | PASS | PASS | FAIL | FAIL | Inadequate |
| 575 | PASS | PASS | PASS | FAIL | FAIL | Inadequate |
| 576 | PASS | PASS | PASS | FAIL | FAIL | Inadequate |
| 577 | PASS | PASS | PASS | FAIL | FAIL | Inadequate |
| 578 | PASS | PASS | PASS | FAIL | FAIL | Inadequate |
| 579 | PASS | PASS | PASS | FAIL | FAIL | Inadequate |
| 580 | PASS | PASS | PASS | PASS | PASS | Adequate   |
| 581 | PASS | PASS | PASS | PASS | FAIL | Inadequate |
| 582 | PASS | PASS | PASS | PASS | PASS | Adequate   |
| 583 | PASS | PASS | PASS | PASS | PASS | Adequate   |
| 584 | PASS | PASS | PASS | PASS | FAIL | Inadequate |
| 585 | PASS | FAIL | FAIL | PASS | PASS | Inadequate |
| 586 | PASS | PASS | PASS | PASS | PASS | Adequate   |
| 587 | PASS | PASS | FAIL | PASS | PASS | Inadequate |
| 588 | PASS | FAIL | PASS | PASS | FAIL | Inadequate |
| 589 | PASS | PASS | PASS | PASS | FAIL | Inadequate |
| 590 | PASS | PASS | PASS | PASS | FAIL | Inadequate |
| 591 | PASS | PASS | FAIL | PASS | PASS | Inadequate |
| 592 | PASS | PASS | PASS | PASS | PASS | Adequate   |
| 593 | PASS | PASS | PASS | PASS | PASS | Adequate   |
| 594 | FAIL | PASS | FAIL | FAIL | FAIL | Inadequate |
| 595 | FAIL | FAIL | FAIL | PASS | FAIL | Inadequate |
| 596 | PASS | PASS | PASS | PASS | FAIL | Inadequate |
| 597 | FAIL | PASS | FAIL | PASS | PASS | Inadequate |
| 598 | PASS | PASS | PASS | PASS | PASS | Adequate   |
| 599 | FAIL | PASS | FAIL | PASS | FAIL | Inadequate |
| 600 | PASS | PASS | PASS | PASS | PASS | Adequate   |
| 601 | FAIL | PASS | PASS | PASS | FAIL | Inadequate |
| 602 | PASS | PASS | PASS | PASS | PASS | Adequate   |
| 603 | PASS | PASS | PASS | PASS | FAIL | Inadequate |
| 604 | PASS | PASS | PASS | PASS | PASS | Adequate   |
| 605 | FAIL | PASS | FAIL | PASS | PASS | Inadequate |
| 606 | PASS | PASS | PASS | PASS | PASS | Adequate   |
| 607 | PASS | PASS | PASS | PASS | PASS | Adequate   |
| 608 | PASS | PASS | PASS | PASS | PASS | Adequate   |
| 609 | FAIL | PASS | PASS | FAIL | PASS | Inadequate |
| 610 | PASS | PASS | PASS | PASS | PASS | Adequate   |
| 611 | PASS | PASS | PASS | PASS | PASS | Adequate   |
| 612 | FAIL | PASS | PASS | FAIL | PASS | Inadequate |
| 613 | PASS | PASS | PASS | PASS | FAIL | Inadequate |
| 614 | PASS | PASS | PASS | PASS | PASS | Adequate   |

|     |      |      |      |      |      |            |
|-----|------|------|------|------|------|------------|
| 615 | PASS | PASS | PASS | FAIL | PASS | Inadequate |
| 616 | PASS | PASS | PASS | PASS | PASS | Adequate   |
| 617 | PASS | PASS | FAIL | PASS | PASS | Inadequate |
| 618 | FAIL | FAIL | FAIL | PASS | FAIL | Inadequate |
| 619 | FAIL | PASS | FAIL | PASS | FAIL | Inadequate |
| 620 | PASS | PASS | FAIL | FAIL | FAIL | Inadequate |
| 621 | PASS | PASS | FAIL | PASS | PASS | Inadequate |
| 622 | FAIL | FAIL | FAIL | FAIL | FAIL | Inadequate |
| 623 | PASS | PASS | FAIL | PASS | FAIL | Inadequate |
| 624 | PASS | PASS | FAIL | PASS | PASS | Inadequate |
| 625 | PASS | PASS | PASS | PASS | PASS | Adequate   |
| 626 | PASS | PASS | FAIL | FAIL | FAIL | Inadequate |
| 627 | PASS | PASS | PASS | PASS | FAIL | Inadequate |
| 628 | PASS | PASS | PASS | PASS | FAIL | Inadequate |
| 629 | PASS | PASS | PASS | PASS | PASS | Adequate   |
| 630 | PASS | PASS | FAIL | PASS | PASS | Inadequate |
| 631 | FAIL | FAIL | FAIL | PASS | FAIL | Inadequate |
| 632 | FAIL | PASS | FAIL | PASS | FAIL | Inadequate |
| 633 | PASS | PASS | FAIL | FAIL | FAIL | Inadequate |
| 634 | PASS | PASS | FAIL | PASS | PASS | Inadequate |
| 635 | FAIL | FAIL | FAIL | FAIL | FAIL | Inadequate |
| 636 | PASS | PASS | FAIL | PASS | FAIL | Inadequate |
| 637 | PASS | PASS | FAIL | PASS | PASS | Inadequate |
| 638 | PASS | PASS | PASS | PASS | PASS | Adequate   |
| 639 | PASS | PASS | FAIL | FAIL | FAIL | Inadequate |
| 640 | PASS | PASS | PASS | PASS | FAIL | Inadequate |
| 641 | PASS | PASS | PASS | PASS | FAIL | Inadequate |
| 642 | PASS | PASS | PASS | PASS | PASS | Adequate   |
| 643 | PASS | PASS | FAIL | FAIL | FAIL | Inadequate |
| 644 | FAIL | PASS | PASS | PASS | FAIL | Inadequate |
| 645 | FAIL | PASS | PASS | PASS | FAIL | Inadequate |
| 646 | FAIL | PASS | PASS | PASS | FAIL | Inadequate |
| 647 | FAIL | PASS | PASS | PASS | FAIL | Inadequate |
| 648 | PASS | PASS | PASS | FAIL | PASS | Inadequate |
| 649 | PASS | PASS | PASS | PASS | PASS | Adequate   |
| 650 | FAIL | PASS | PASS | FAIL | PASS | Inadequate |
| 651 | PASS | PASS | PASS | PASS | PASS | Adequate   |
| 652 | PASS | PASS | PASS | PASS | PASS | Adequate   |
| 653 | PASS | PASS | PASS | PASS | PASS | Adequate   |
| 654 | PASS | PASS | FAIL | FAIL | PASS | Inadequate |
| 655 | PASS | PASS | FAIL | FAIL | PASS | Inadequate |



|     |      |      |      |      |      |            |
|-----|------|------|------|------|------|------------|
| 656 | PASS | PASS | FAIL | PASS | PASS | Inadequate |
| 657 | PASS | PASS | FAIL | PASS | PASS | Inadequate |
| 658 | FAIL | FAIL | FAIL | PASS | FAIL | Inadequate |
| 659 | PASS | PASS | FAIL | PASS | FAIL | Inadequate |
| 660 | PASS | PASS | PASS | PASS | FAIL | Inadequate |
| 661 | PASS | PASS | PASS | PASS | FAIL | Inadequate |
| 662 | PASS | PASS | PASS | PASS | FAIL | Inadequate |
| 663 | PASS | PASS | FAIL | FAIL | FAIL | Inadequate |
| 664 | PASS | PASS | PASS | PASS | PASS | Adequate   |
| 665 | PASS | PASS | FAIL | PASS | FAIL | Inadequate |
| 666 | PASS | PASS | FAIL | PASS | PASS | Inadequate |
| 667 | FAIL | PASS | FAIL | PASS | FAIL | Inadequate |
| 668 | PASS | FAIL | PASS | PASS | FAIL | Inadequate |
| 669 | PASS | PASS | PASS | PASS | FAIL | Inadequate |
| 670 | FAIL | PASS | FAIL | FAIL | FAIL | Inadequate |
| 671 | PASS | PASS | PASS | PASS | PASS | Adequate   |
| 672 | FAIL | PASS | FAIL | PASS | PASS | Inadequate |
| 673 | PASS | PASS | FAIL | FAIL | FAIL | Inadequate |
| 674 | PASS | PASS | PASS | PASS | PASS | Adequate   |
| 675 | PASS | PASS | PASS | PASS | PASS | Adequate   |
| 676 | PASS | PASS | PASS | PASS | PASS | Adequate   |
| 677 | PASS | PASS | PASS | FAIL | PASS | Inadequate |
| 678 | PASS | PASS | FAIL | PASS | PASS | Inadequate |
| 679 | PASS | PASS | PASS | PASS | FAIL | Inadequate |
| 680 | PASS | PASS | PASS | PASS | PASS | Adequate   |
| 681 | PASS | PASS | PASS | PASS | FAIL | Inadequate |
| 682 | PASS | PASS | PASS | PASS | PASS | Adequate   |
| 683 | FAIL | PASS | FAIL | PASS | FAIL | Inadequate |
| 684 | PASS | PASS | PASS | PASS | PASS | Adequate   |
| 685 | FAIL | PASS | PASS | PASS | FAIL | Inadequate |
| 686 | PASS | PASS | PASS | PASS | PASS | Adequate   |
| 687 | PASS | PASS | PASS | PASS | FAIL | Inadequate |
| 688 | PASS | PASS | PASS | PASS | PASS | Adequate   |
| 689 | PASS | PASS | PASS | FAIL | PASS | Inadequate |
| 690 | FAIL | PASS | FAIL | FAIL | FAIL | Inadequate |
| 691 | PASS | PASS | PASS | PASS | PASS | Adequate   |
| 692 | FAIL | PASS | FAIL | PASS | PASS | Inadequate |
| 693 | PASS | PASS | FAIL | FAIL | FAIL | Inadequate |
| 694 | PASS | PASS | PASS | PASS | PASS | Adequate   |
| 695 | PASS | PASS | PASS | PASS | PASS | Adequate   |
| 696 | PASS | PASS | PASS | PASS | FAIL | Inadequate |

|     |      |      |      |      |      |            |
|-----|------|------|------|------|------|------------|
| 697 | PASS | PASS | PASS | PASS | FAIL | Inadequate |
| 698 | PASS | PASS | PASS | PASS | PASS | Adequate   |
| 699 | PASS | PASS | PASS | PASS | PASS | Adequate   |
| 700 | PASS | PASS | FAIL | PASS | FAIL | Inadequate |
| 701 | FAIL | PASS | FAIL | FAIL | FAIL | Inadequate |
| 702 | PASS | PASS | PASS | PASS | PASS | Adequate   |
| 703 | PASS | PASS | PASS | FAIL | PASS | Inadequate |
| 704 | PASS | PASS | FAIL | PASS | PASS | Inadequate |
| 705 | PASS | PASS | PASS | PASS | FAIL | Inadequate |
| 706 | PASS | PASS | PASS | PASS | PASS | Adequate   |
| 707 | PASS | PASS | PASS | PASS | FAIL | Inadequate |
| 708 | PASS | PASS | PASS | PASS | PASS | Adequate   |
| 709 | FAIL | PASS | FAIL | PASS | FAIL | Inadequate |
| 710 | PASS | FAIL | FAIL | PASS | FAIL | Inadequate |
| 711 | PASS | PASS | FAIL | PASS | PASS | Inadequate |
| 712 | PASS | FAIL | FAIL | PASS | PASS | Inadequate |
| 713 | PASS | PASS | PASS | PASS | PASS | Adequate   |
| 714 | PASS | PASS | FAIL | PASS | PASS | Inadequate |
| 715 | PASS | FAIL | PASS | PASS | FAIL | Inadequate |
| 716 | PASS | PASS | PASS | PASS | FAIL | Inadequate |
| 717 | PASS | PASS | PASS | PASS | FAIL | Inadequate |
| 718 | PASS | PASS | FAIL | PASS | PASS | Inadequate |
| 719 | PASS | PASS | PASS | PASS | PASS | Adequate   |
| 720 | PASS | PASS | PASS | PASS | PASS | Adequate   |
| 721 | FAIL | PASS | FAIL | FAIL | FAIL | Inadequate |
| 722 | FAIL | FAIL | FAIL | PASS | FAIL | Inadequate |
| 723 | PASS | PASS | PASS | PASS | FAIL | Inadequate |
| 724 | FAIL | PASS | FAIL | PASS | PASS | Inadequate |
| 725 | PASS | PASS | PASS | PASS | PASS | Adequate   |
| 726 | FAIL | PASS | FAIL | PASS | FAIL | Inadequate |
| 727 | PASS | PASS | PASS | PASS | PASS | Adequate   |
| 728 | FAIL | PASS | PASS | PASS | FAIL | Inadequate |
| 729 | PASS | PASS | PASS | PASS | PASS | Adequate   |
| 730 | PASS | PASS | PASS | PASS | FAIL | Inadequate |
| 731 | PASS | PASS | PASS | PASS | PASS | Adequate   |
| 732 | FAIL | PASS | FAIL | PASS | PASS | Inadequate |
| 733 | PASS | PASS | PASS | PASS | PASS | Adequate   |
| 734 | PASS | PASS | PASS | PASS | PASS | Adequate   |
| 735 | FAIL | PASS | PASS | PASS | PASS | Inadequate |
| 736 | FAIL | FAIL | PASS | PASS | PASS | Inadequate |
| 737 | PASS | PASS | PASS | PASS | PASS | Adequate   |

|     |      |      |      |      |      |            |
|-----|------|------|------|------|------|------------|
| 738 | FAIL | PASS | FAIL | PASS | PASS | Inadequate |
| 739 | FAIL | PASS | FAIL | PASS | FAIL | Inadequate |
| 740 | FAIL | PASS | FAIL | PASS | PASS | Inadequate |
| 741 | PASS | PASS | PASS | PASS | PASS | Adequate   |
| 742 | PASS | PASS | PASS | PASS | PASS | Adequate   |
| 743 | PASS | FAIL | FAIL | PASS | PASS | Inadequate |
| 744 | PASS | PASS | PASS | PASS | PASS | Adequate   |
| 745 | FAIL | PASS | FAIL | PASS | PASS | Inadequate |
| 746 | PASS | PASS | PASS | PASS | PASS | Adequate   |
| 747 | PASS | PASS | FAIL | PASS | PASS | Inadequate |
| 748 | PASS | PASS | PASS | PASS | PASS | Adequate   |
| 749 | FAIL | PASS | PASS | PASS | FAIL | Inadequate |
| 750 | PASS | PASS | PASS | PASS | FAIL | Inadequate |
| 751 | PASS | PASS | PASS | PASS | PASS | Adequate   |
| 752 | PASS | PASS | PASS | PASS | PASS | Adequate   |
| 753 | PASS | PASS | PASS | PASS | FAIL | Inadequate |
| 754 | PASS | PASS | PASS | PASS | FAIL | Inadequate |
| 755 | PASS | PASS | PASS | FAIL | PASS | Inadequate |
| 756 | PASS | PASS | PASS | PASS | PASS | Adequate   |
| 757 | FAIL | PASS | PASS | FAIL | PASS | Inadequate |
| 758 | PASS | PASS | PASS | PASS | PASS | Adequate   |
| 759 | PASS | PASS | PASS | PASS | PASS | Adequate   |
| 760 | PASS | PASS | PASS | PASS | PASS | Adequate   |
| 761 | PASS | PASS | PASS | PASS | PASS | Adequate   |
| 762 | PASS | PASS | PASS | PASS | PASS | Adequate   |
| 763 | PASS | PASS | PASS | FAIL | PASS | Inadequate |
| 764 | PASS | PASS | PASS | PASS | PASS | Adequate   |
| 765 | PASS | PASS | FAIL | PASS | PASS | Inadequate |
| 766 | PASS | PASS | FAIL | FAIL | PASS | Inadequate |
| 767 | FAIL | PASS | PASS | PASS | PASS | Inadequate |
| 768 | PASS | PASS | PASS | PASS | PASS | Adequate   |
| 769 | PASS | PASS | PASS | PASS | PASS | Adequate   |
| 770 | PASS | FAIL | FAIL | PASS | PASS | Inadequate |
| 771 | PASS | PASS | PASS | PASS | FAIL | Inadequate |
| 772 | PASS | PASS | PASS | PASS | FAIL | Inadequate |
| 773 | PASS | PASS | PASS | PASS | FAIL | Inadequate |
| 774 | PASS | PASS | PASS | PASS | FAIL | Inadequate |
| 775 | PASS | PASS | FAIL | FAIL | FAIL | Inadequate |
| 776 | PASS | PASS | PASS | PASS | PASS | Adequate   |
| 777 | PASS | PASS | FAIL | PASS | FAIL | Inadequate |
| 778 | PASS | PASS | FAIL | PASS | PASS | Inadequate |

|     |      |      |      |      |      |            |
|-----|------|------|------|------|------|------------|
| 779 | FAIL | PASS | FAIL | PASS | FAIL | Inadequate |
| 780 | PASS | FAIL | PASS | PASS | FAIL | Inadequate |
| 781 | PASS | PASS | PASS | PASS | FAIL | Inadequate |
| 782 | PASS | PASS | PASS | PASS | FAIL | Inadequate |
| 783 | FAIL | PASS | FAIL | FAIL | FAIL | Inadequate |
| 784 | PASS | PASS | FAIL | PASS | FAIL | Inadequate |
| 785 | PASS | PASS | PASS | PASS | PASS | Adequate   |
| 786 | PASS | PASS | PASS | PASS | FAIL | Inadequate |
| 787 | PASS | PASS | FAIL | PASS | PASS | Inadequate |
| 788 | PASS | PASS | PASS | PASS | FAIL | Inadequate |
| 789 | PASS | PASS | PASS | PASS | FAIL | Inadequate |
| 790 | PASS | PASS | PASS | PASS | PASS | Adequate   |
| 791 | PASS | PASS | PASS | PASS | PASS | Adequate   |
| 792 | PASS | PASS | PASS | PASS | PASS | Adequate   |
| 793 | PASS | PASS | PASS | PASS | PASS | Adequate   |
| 794 | PASS | PASS | PASS | PASS | PASS | Adequate   |
| 795 | PASS | PASS | PASS | PASS | FAIL | Inadequate |
| 796 | PASS | PASS | PASS | PASS | PASS | Adequate   |
| 797 | PASS | PASS | FAIL | PASS | FAIL | Inadequate |
| 798 | PASS | PASS | PASS | PASS | PASS | Adequate   |

| Identify at least one mode of rabies transmission | Identify a potential reservoir species for rabies | Identify notable signs in rabid animals | Identify appropriate health seeking behaviour after an exposure has occurred | Identify the appropriate course of action to be taken with a suspect rabid animal after exposure |
|---------------------------------------------------|---------------------------------------------------|-----------------------------------------|------------------------------------------------------------------------------|--------------------------------------------------------------------------------------------------|
| None                                              | None                                              | None                                    | None                                                                         | None                                                                                             |
| Dog bites                                         | Dog                                               | Salivation                              | Wash wound with antiseptic                                                   | Report to the nearest vet                                                                        |
| Dog bite / licking wounds                         | Cat                                               | Change in behaviour (e.g. aggression)   | Wash with water only                                                         | Report to the police                                                                             |
|                                                   | Cat and Dog                                       | Neurological signs                      | Go to the clinic/vet                                                         | Kill the dog                                                                                     |
|                                                   | Livestock                                         | Combination of above                    | Go to the police                                                             | Other                                                                                            |
|                                                   | Dog and Livestock                                 |                                         | Inform the owner                                                             | Any of the combinations                                                                          |
|                                                   | Cat and Livestock                                 |                                         | Any of the combinations                                                      |                                                                                                  |
|                                                   | Other warm blooded mammals                        |                                         |                                                                              |                                                                                                  |
|                                                   | Dog and other warm blooded mammals                |                                         |                                                                              |                                                                                                  |
|                                                   | Cat and Other                                     |                                         |                                                                              |                                                                                                  |
|                                                   | Livestock and Other                               |                                         |                                                                              |                                                                                                  |
|                                                   | All warm blooded mammals                          |                                         |                                                                              |                                                                                                  |
|                                                   | Dog, Cat and warm blooded mammals                 |                                         |                                                                              |                                                                                                  |
